# Supplementary material for: Chemical Constituents from the Aerial Parts of Artemisia iwayomogi and Their Anti-Neuroinflammatory Activities
Source: MDPI journal article supplement (doi:10.3390/plants11151954), 2022-07-27

# Supplementary data

## Table of contents

**Fig. S1.** HR-DART-MS spectrum of compound **1**

**Fig. S2.** IR spectrum of compound **1**

**Fig. S3.**  $^1\text{H}$  NMR spectrum of compound **1** (500 MHz, methanol- $d_4$ )

**Fig. S4.**  $^{13}\text{C}$  NMR spectrum of compound **1** (125 MHz, methanol- $d_4$ )

**Fig. S5.**  $^1\text{H}$   $^{13}\text{C}$  HSQC spectrum of compound **1**

**Fig. S6.**  $^1\text{H}$   $^1\text{H}$  COSY spectrum of compound **1**

**Fig. S7.**  $^1\text{H}$   $^{13}\text{C}$  HMBC spectrum of compound **1**

**Fig. S8.**  $^1\text{H}$   $^1\text{H}$  NOESY spectrum of compound **1**

**Fig. S9.** HR-DART-MS spectrum of compound **2**

**Fig. S10.** IR spectrum of compound **2**

**Fig. S11.**  $^1\text{H}$  NMR spectrum of compound **2** (500 MHz, methanol- $d_4$ )

**Fig. S12.**  $^{13}\text{C}$  NMR spectrum of compound **2** (125 MHz, methanol- $d_4$ )

**Fig. S13.**  $^1\text{H}$   $^{13}\text{C}$  HSQC spectrum of compound **2**

**Fig. S14.**  $^1\text{H}$   $^1\text{H}$  COSY spectrum of compound **2**

**Fig. S15.**  $^1\text{H}$   $^{13}\text{C}$  HMBC spectrum of compound **2**

**Fig. S16.**  $^1\text{H}$   $^1\text{H}$  NOESY spectrum of compound **2**

**Fig. S1.** HR-DART-MS spectrum of compound **1**

Data:201027\_PV1200\_DV1950\_300C

Sample Name:

Description:

Ionization Mode:ESI+

History:Determine m/z[Peak Detect[Centroid,25,Area];Correct Base[5.0%]];Correct Base[5.0%];Average(MS[1] 19....

Acquired:10/27/2020 12:53:36 PM

Operator:Administrator

Mass Calibration data:201027\_2

Created:10/27/2020 3:51:06 PM

Created by:Administrator

Charge number:1

Tolerance:5.00(mmu)

Unsaturation Number:-1.5 .. 20.0 (Fraction:Both)

Element:<sup>12</sup>C:0 .. 100, <sup>1</sup>H:0 .. 200, <sup>14</sup>N:1 .. 1, <sup>16</sup>O:0 .. 10

| Mass      | Intensity | Relative Intensity | Calc. Mass | Mass Difference (mmu) | Possible Formula                                                                                                     | Unsaturation Number |
|-----------|-----------|--------------------|------------|-----------------------|----------------------------------------------------------------------------------------------------------------------|---------------------|
| 338.16009 | 78766.00  | 72.30              | 338.16036  | -0.27                 | <sup>12</sup> C <sub>17</sub> <sup>1</sup> H <sub>24</sub> <sup>14</sup> N <sub>1</sub> <sup>16</sup> O <sub>6</sub> | 6.5                 |

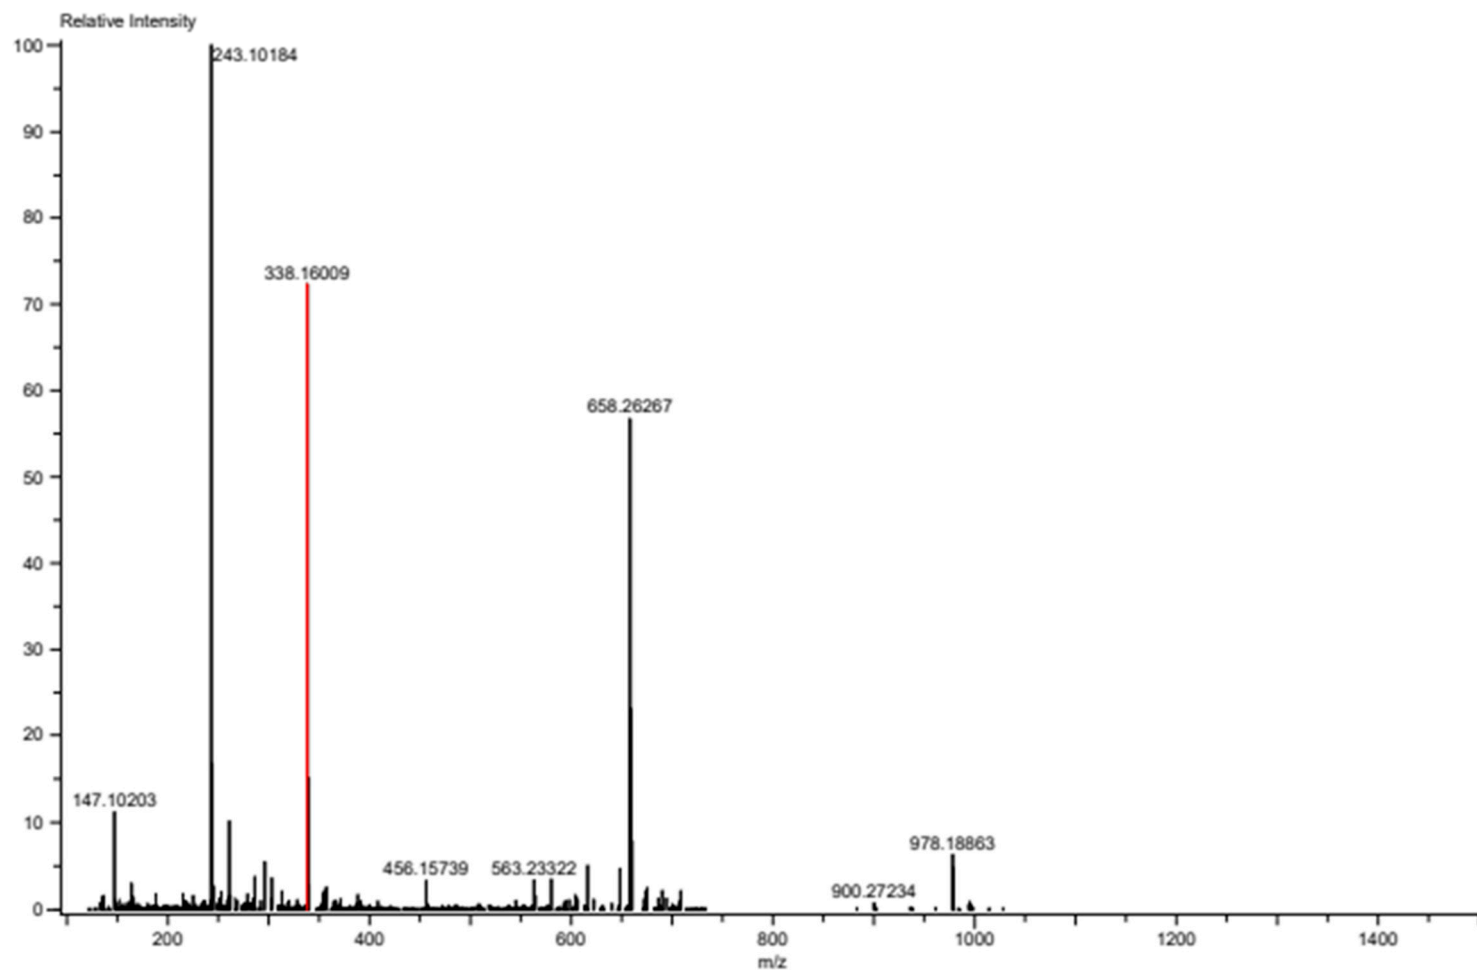

**Fig. S2.** IR spectrum of compound **1**

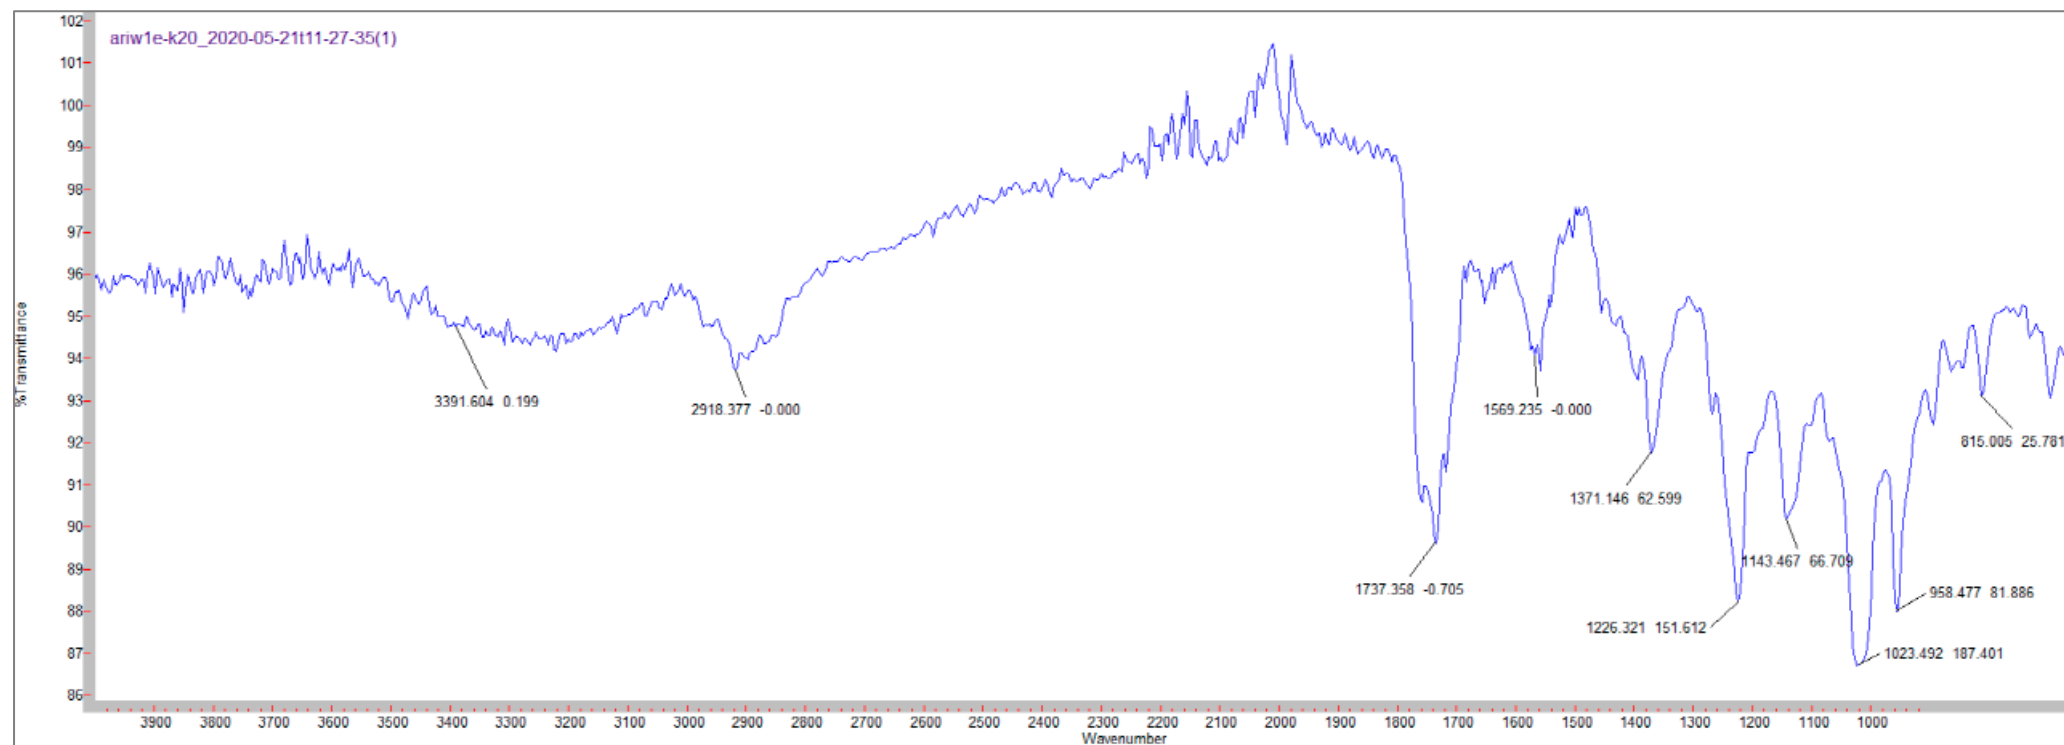

**Fig. S3.**  $^1\text{H}$  NMR spectrum of compound **1** (500 MHz, methanol- $d_4$ )

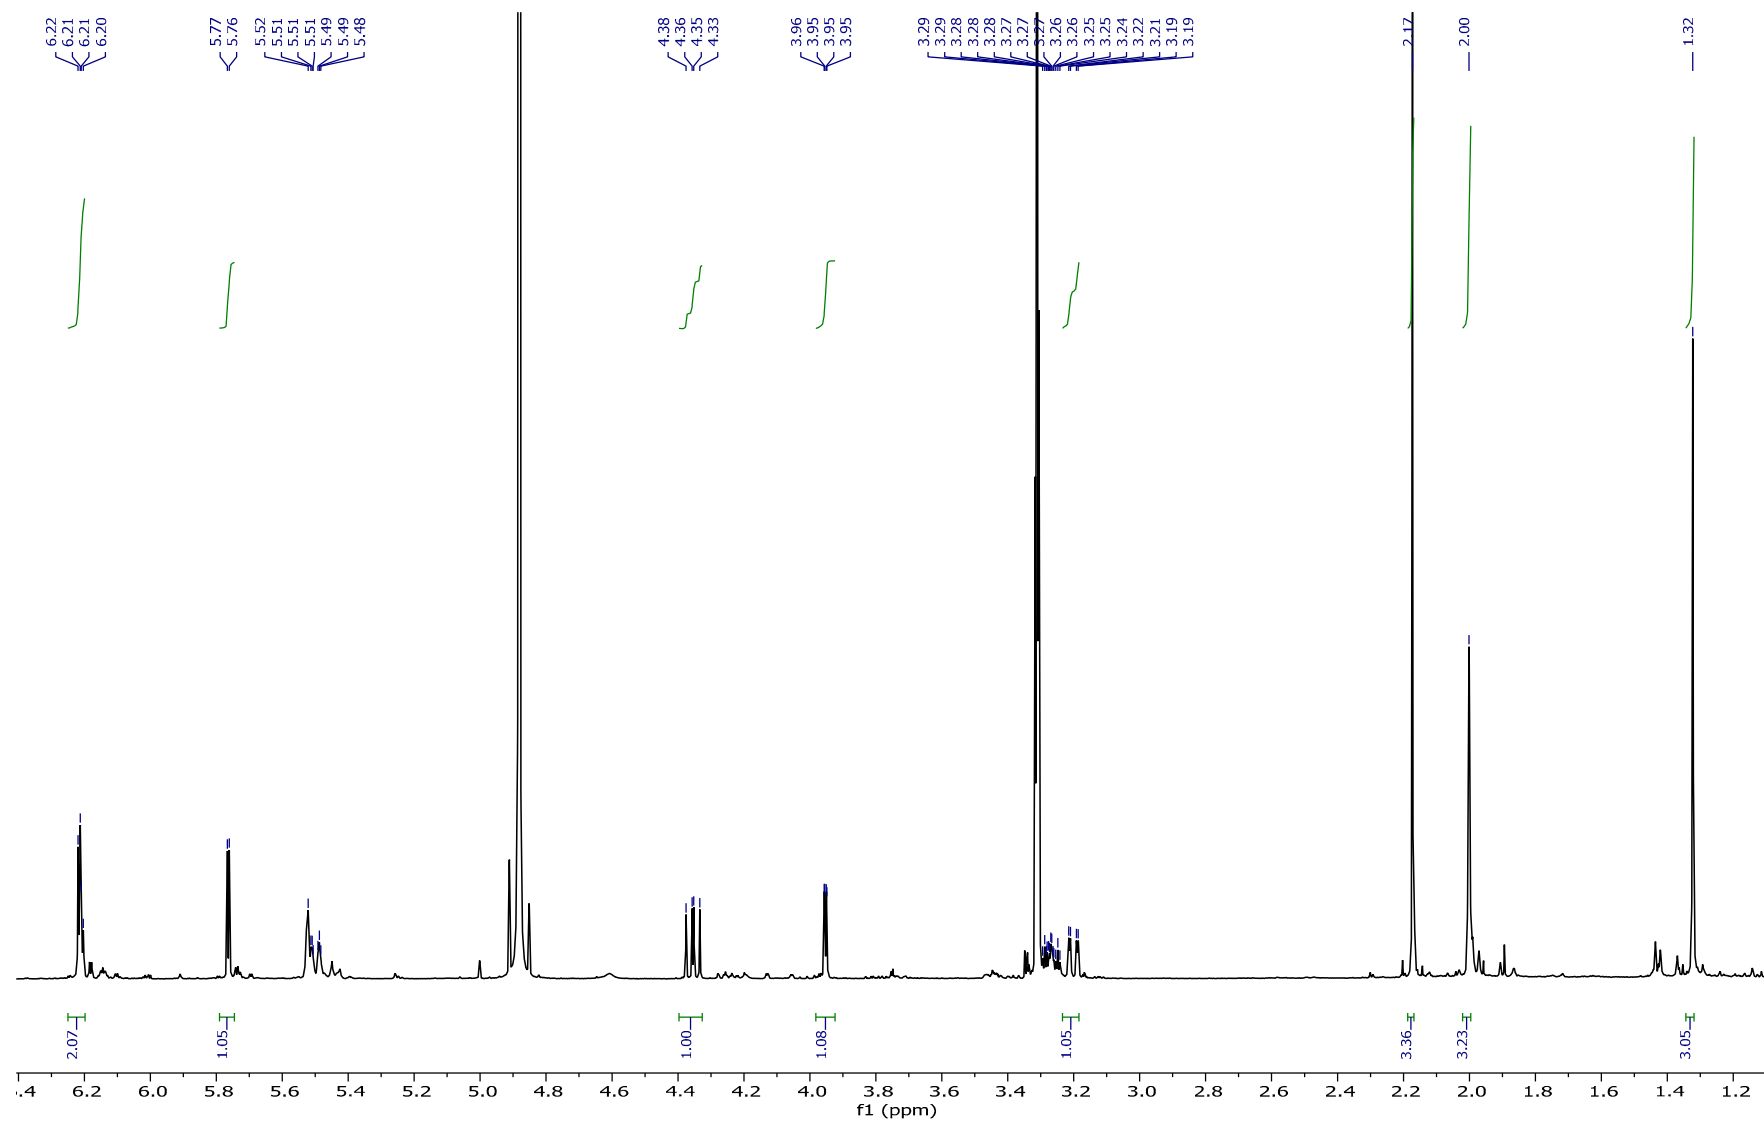

**Fig. S4.**  $^{13}\text{C}$  NMR spectrum of compound **1** (125 MHz, methanol- $d_4$ )

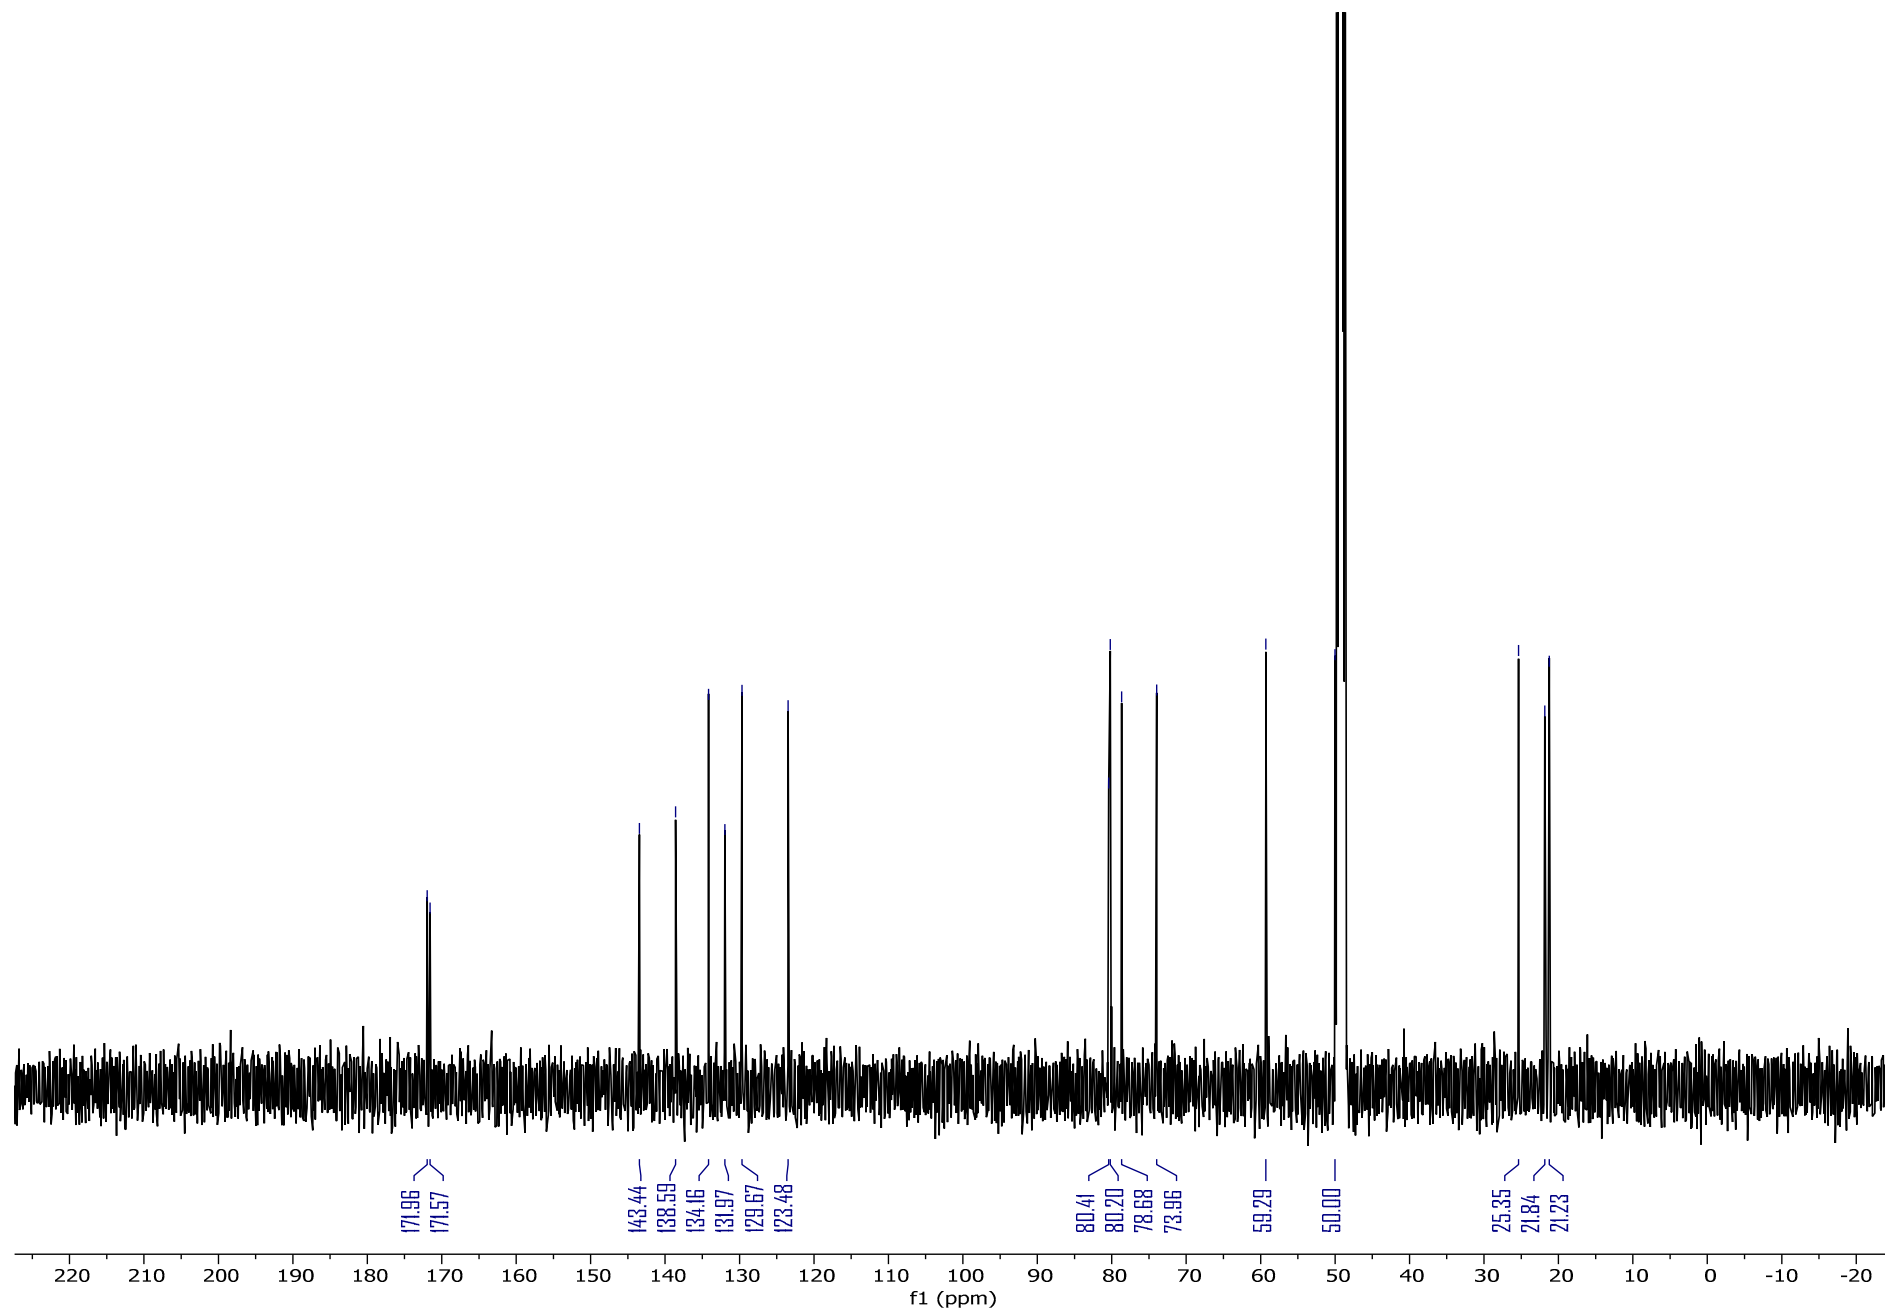

**Fig. S5.**  $^1\text{H}$   $^{13}\text{C}$  HSQC spectrum of compound **1**

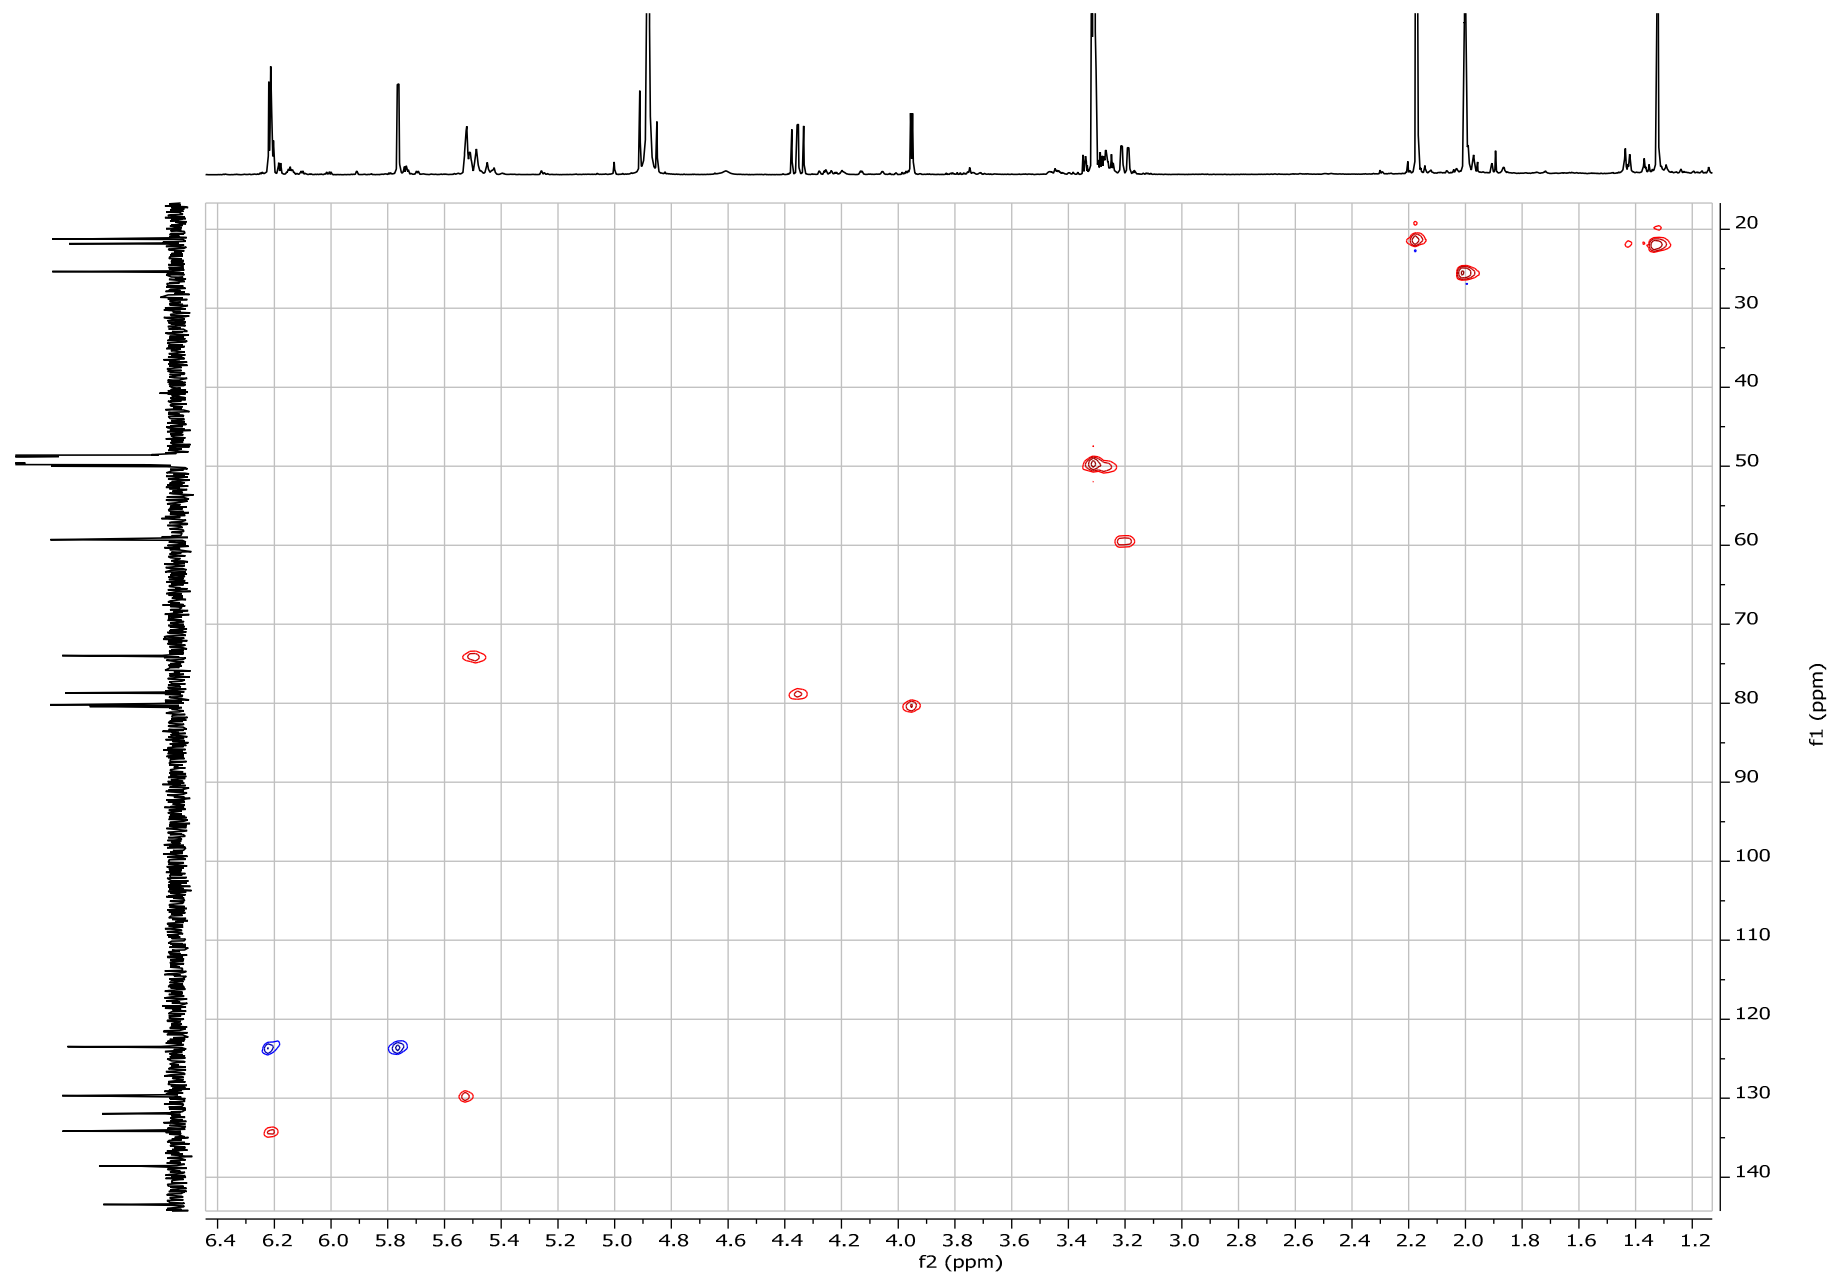

**Fig. S6.**  $^1\text{H}$   $^1\text{H}$  COSY spectrum of compound **1**

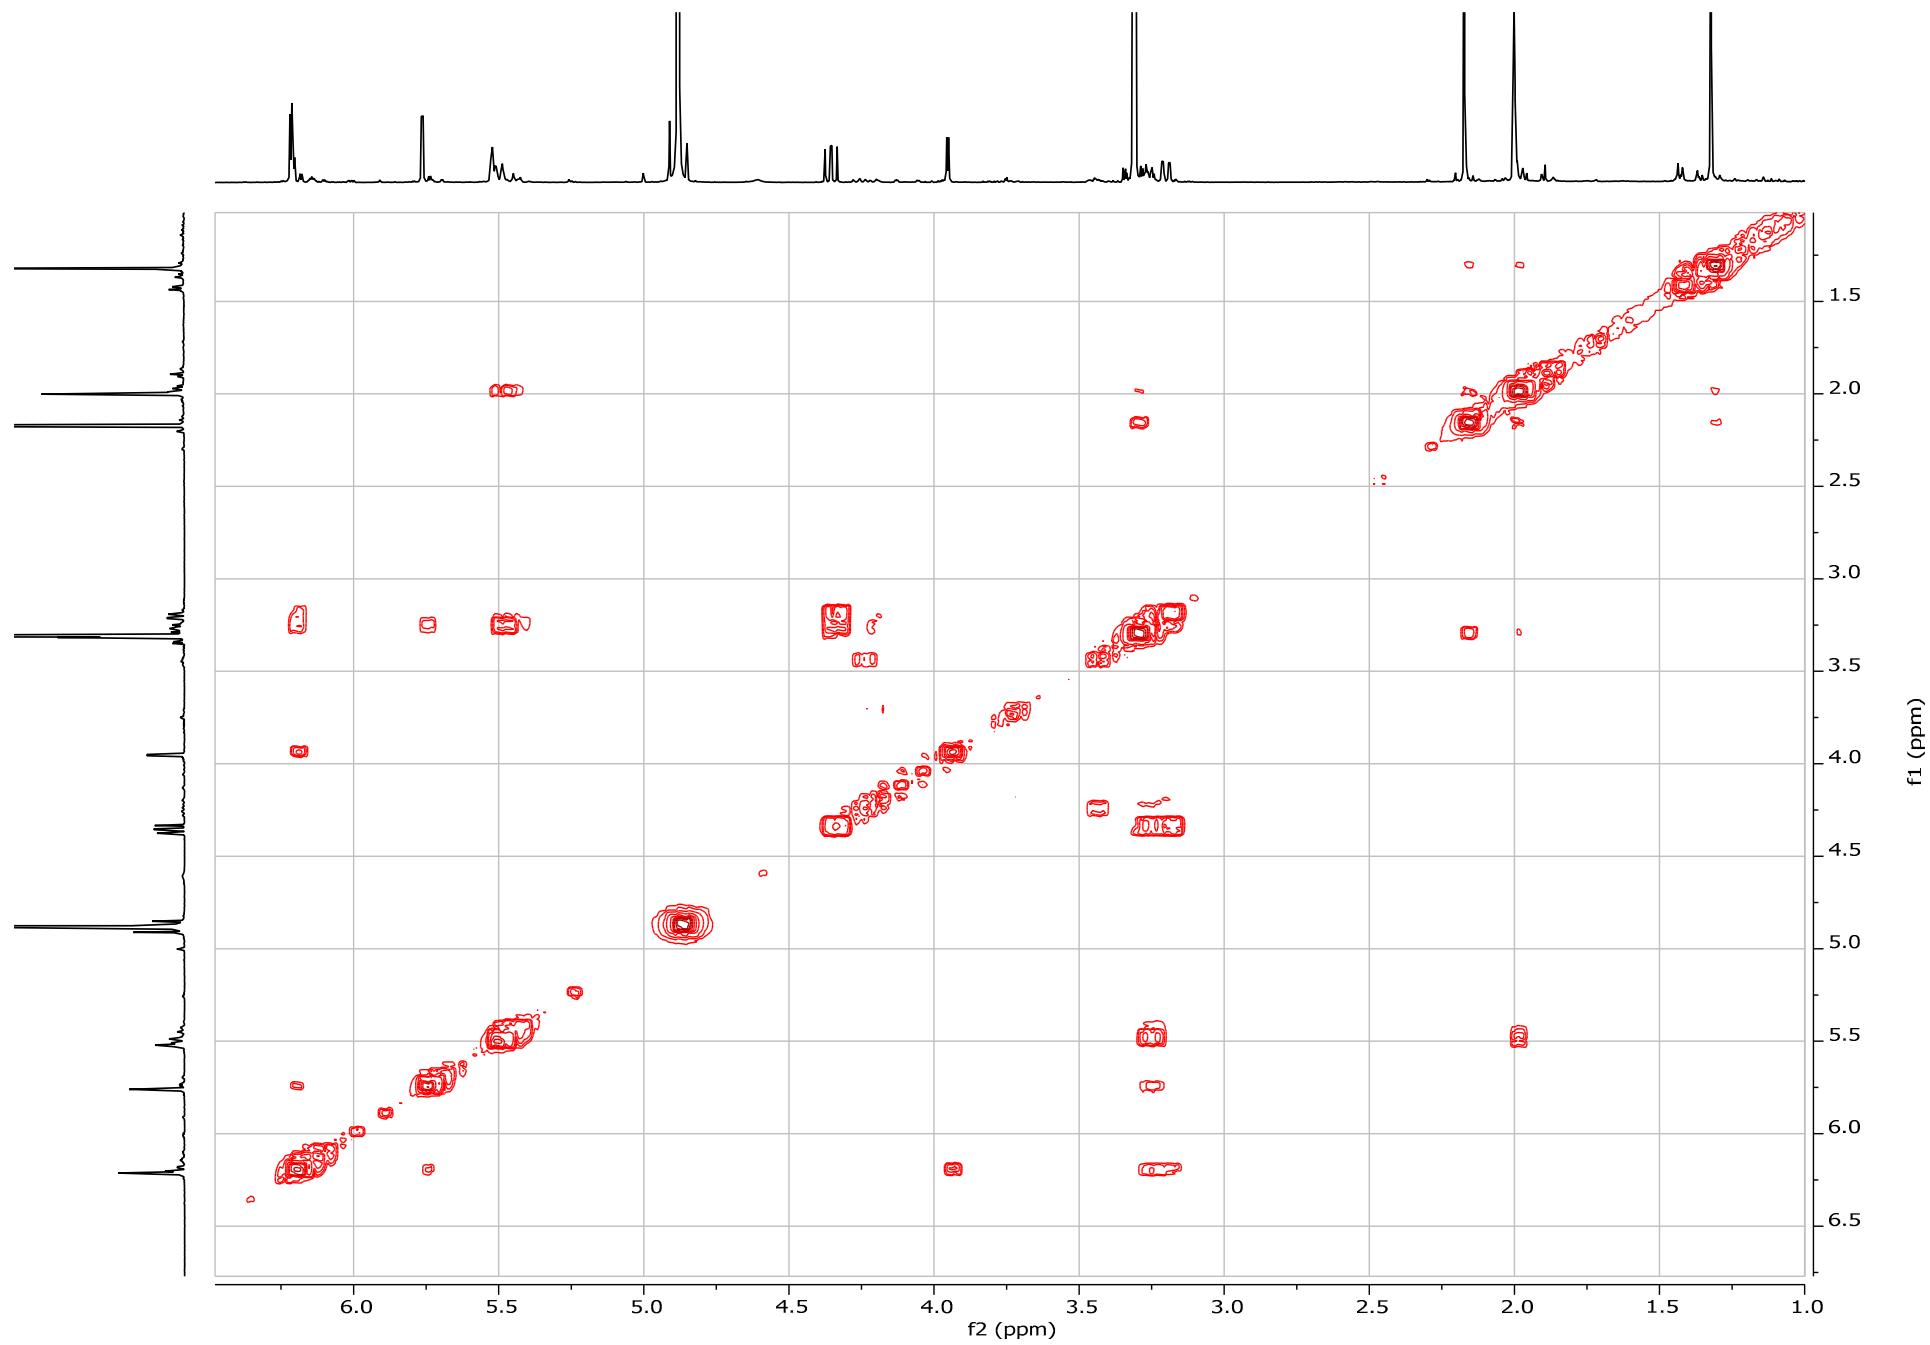

**Fig. S7.**  $^1\text{H}$   $^{13}\text{C}$  HMBC spectrum of compound **1**

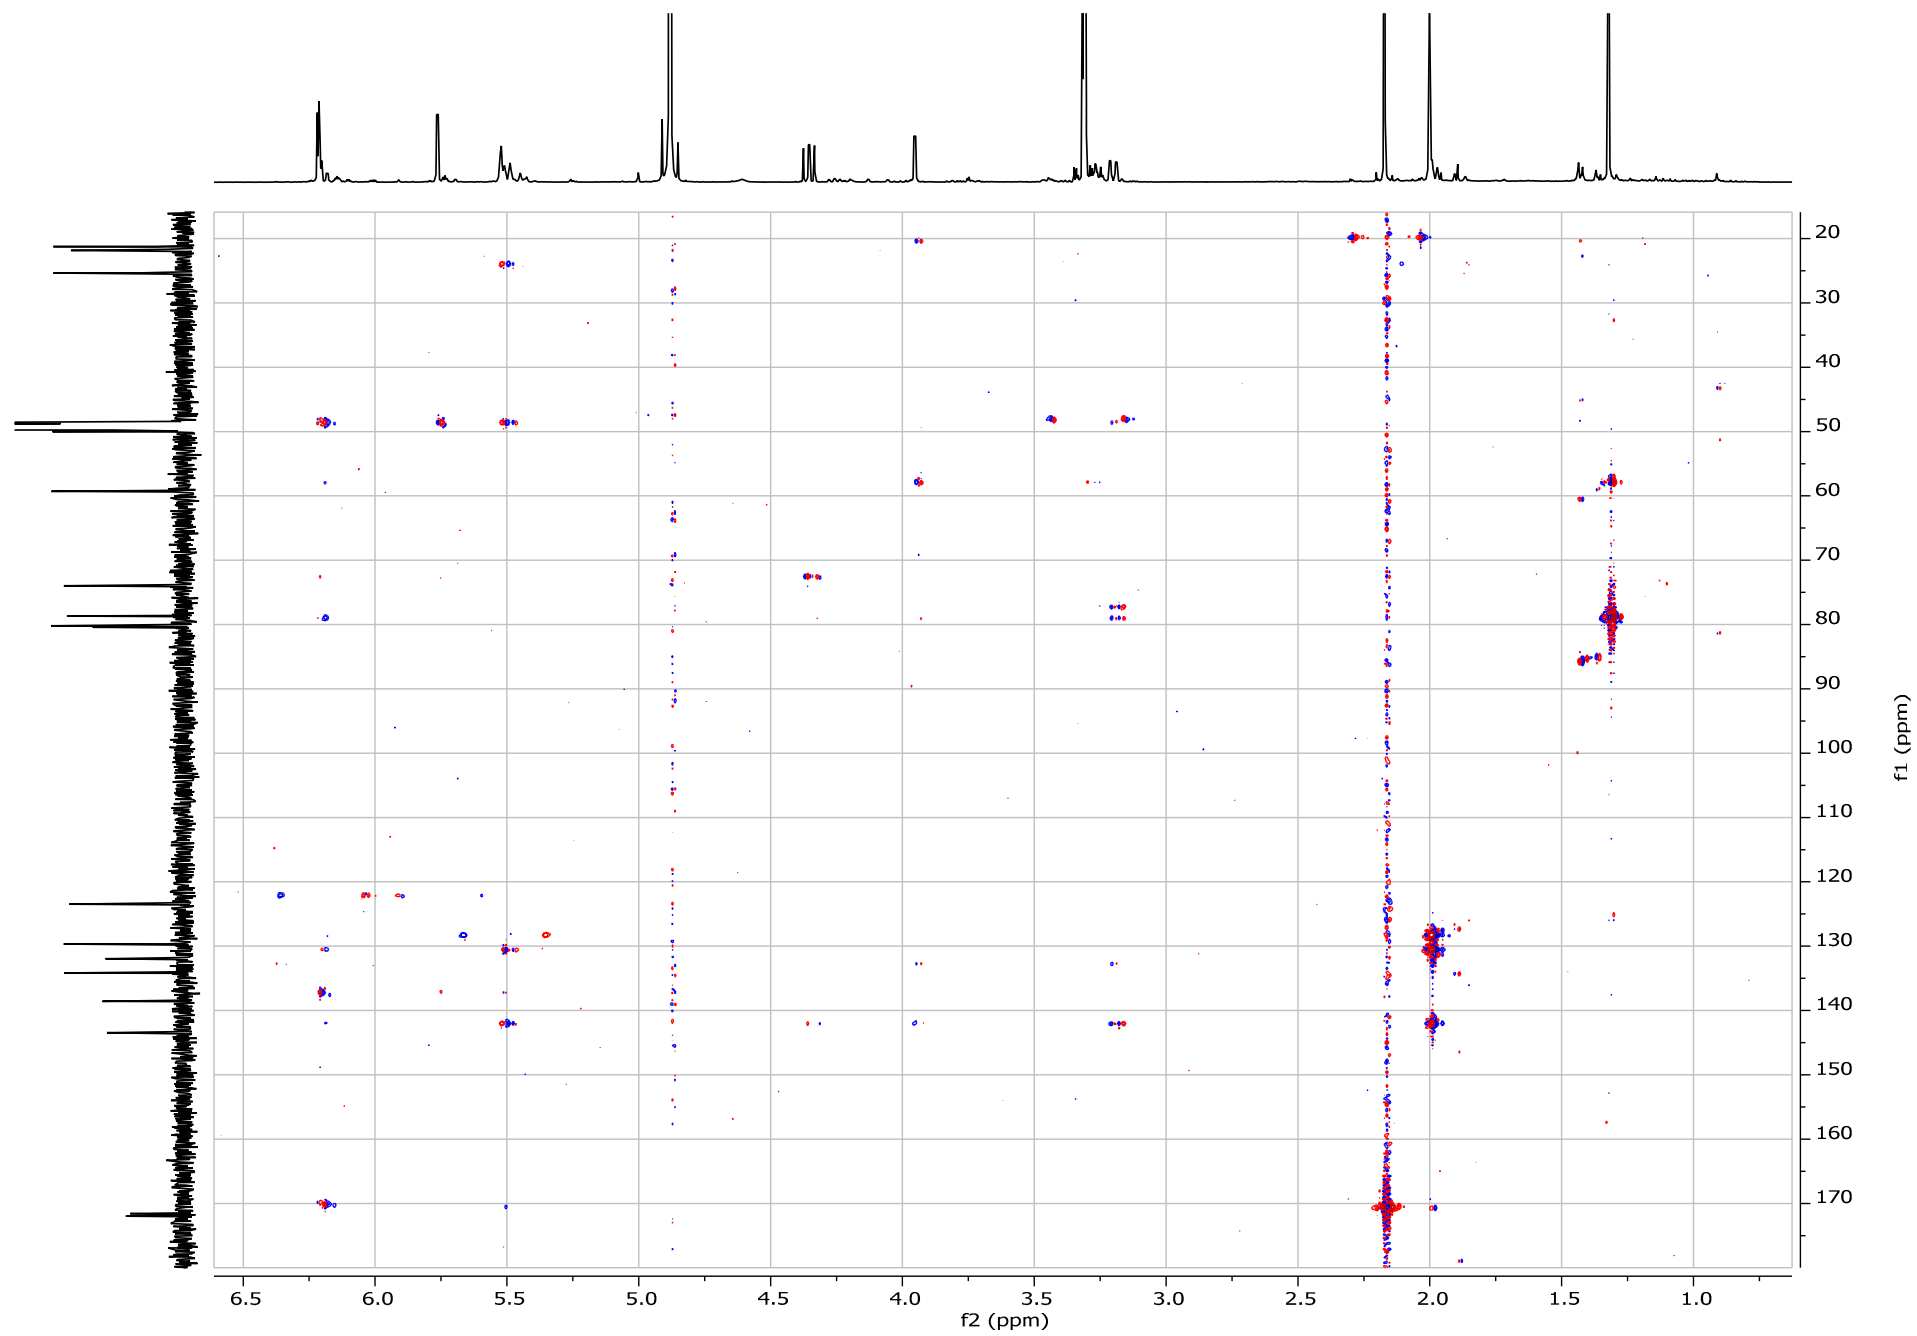



**Fig. S8.**  $^1\text{H}$   $^1\text{H}$  NOESY spectrum of compound **1**

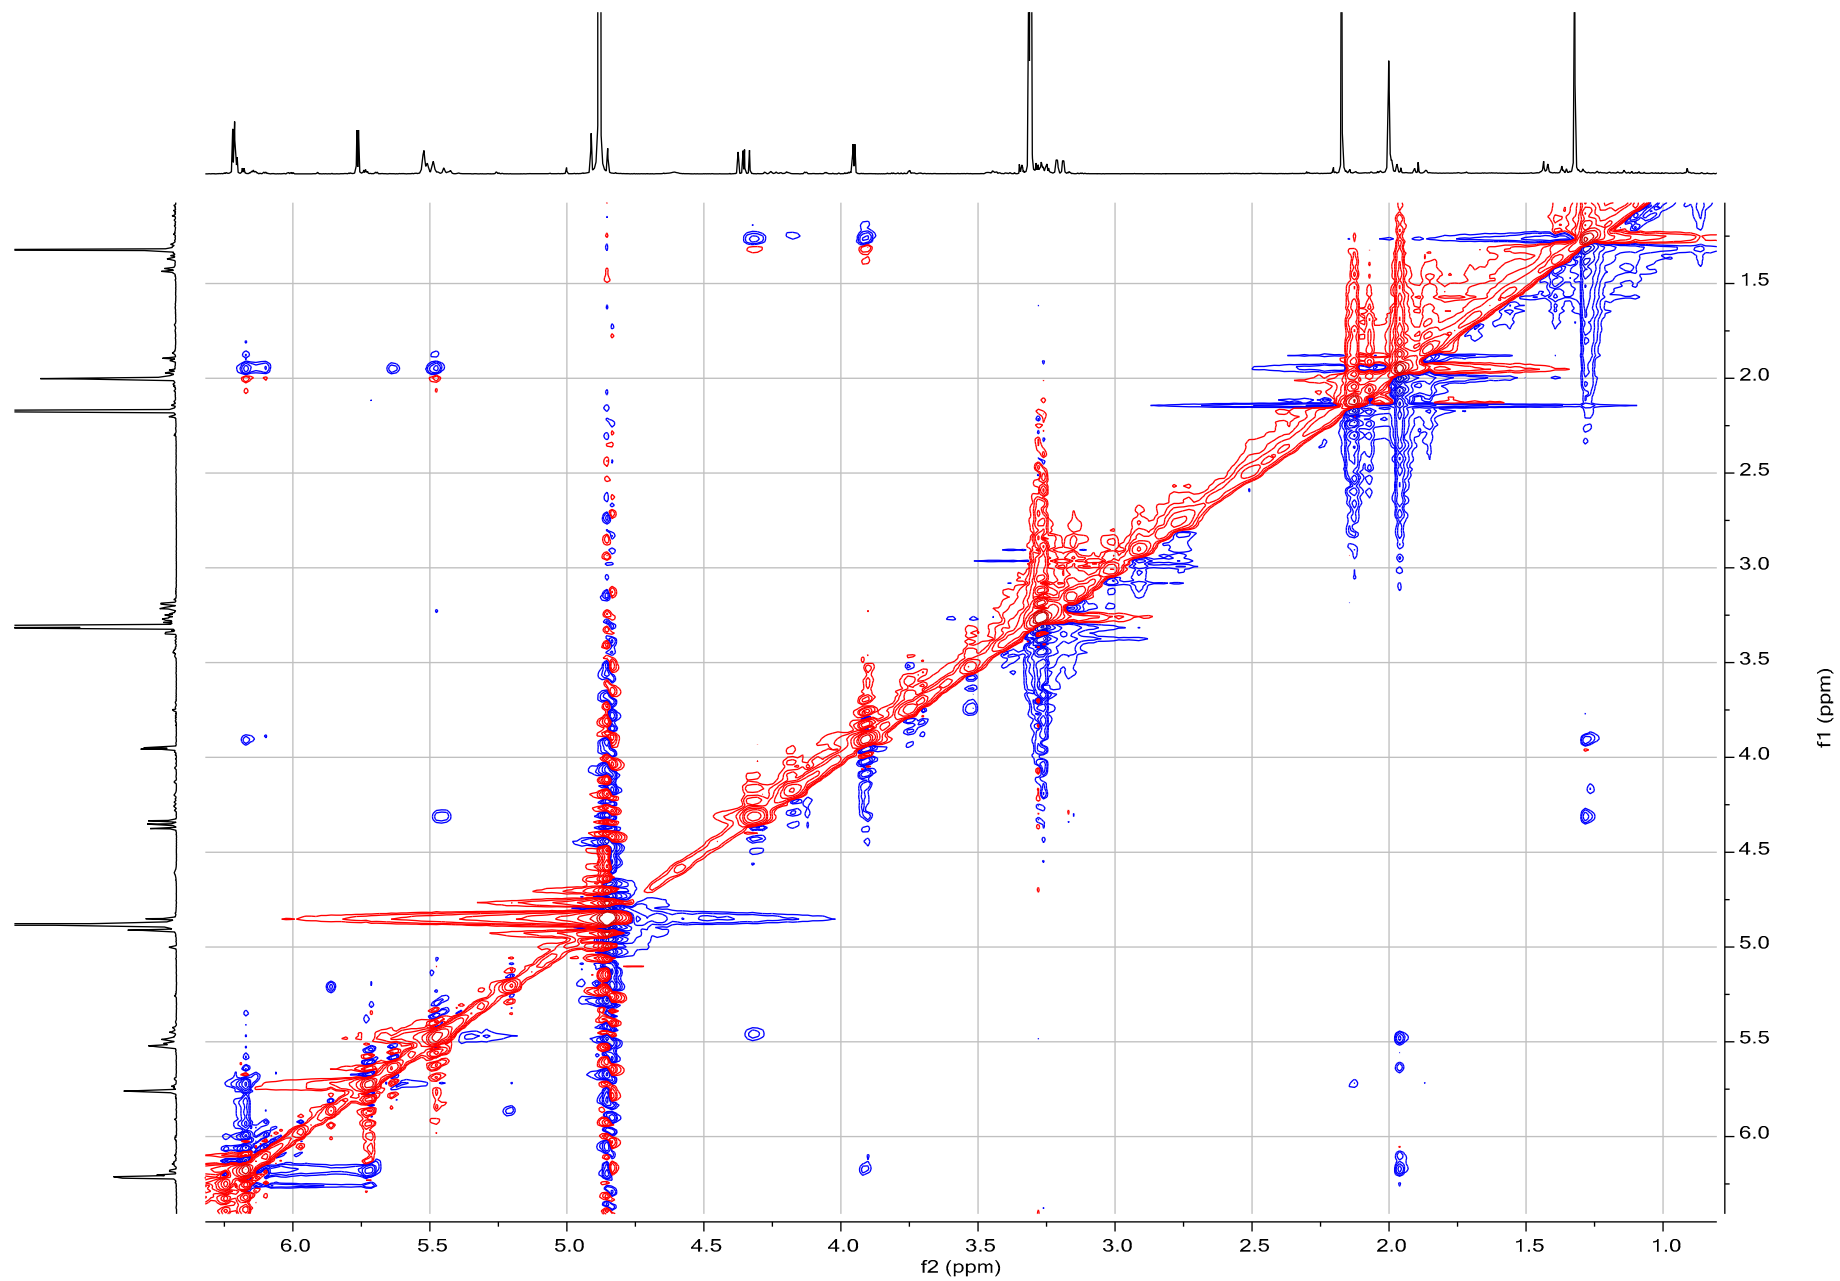

**Fig. S9.** HR-DART-MS spectrum of compound **2**

Data:201027\_PV1200\_DV1950\_300C

Sample Name:

Description:

Ionization Mode:ESI+

History:Determine m/z[Peak Detect[Centroid,25,Area];Correct Base[5.0%];Correct Base[5.0%];Average(MS[1] 18....

Acquired:10/27/2020 12:53:36 PM

Operator:Administrator

Mass Calibration data:201027\_2

Created:10/27/2020 3:48:40 PM

Created by:Administrator

Charge number:1

Tolerance:5.00(mmu)

Unsaturation Number:-1.5 .. 20.0 (Fraction:Both)

Element:<sup>12</sup>C:0 .. 100, <sup>1</sup>H:0 .. 200, <sup>14</sup>N:1 .. 1, <sup>16</sup>O:0 .. 10

| Mass      | Intensity | Relative Intensity | Calc. Mass | Mass Difference (mmu) | Possible Formula                                                                                                     | Unsaturation Number |
|-----------|-----------|--------------------|------------|-----------------------|----------------------------------------------------------------------------------------------------------------------|---------------------|
| 338.16007 | 62399.44  | 100.00             | 338.16036  | -0.29                 | <sup>12</sup> C <sub>17</sub> <sup>1</sup> H <sub>24</sub> <sup>14</sup> N <sub>1</sub> <sup>16</sup> O <sub>6</sub> | 6.5                 |

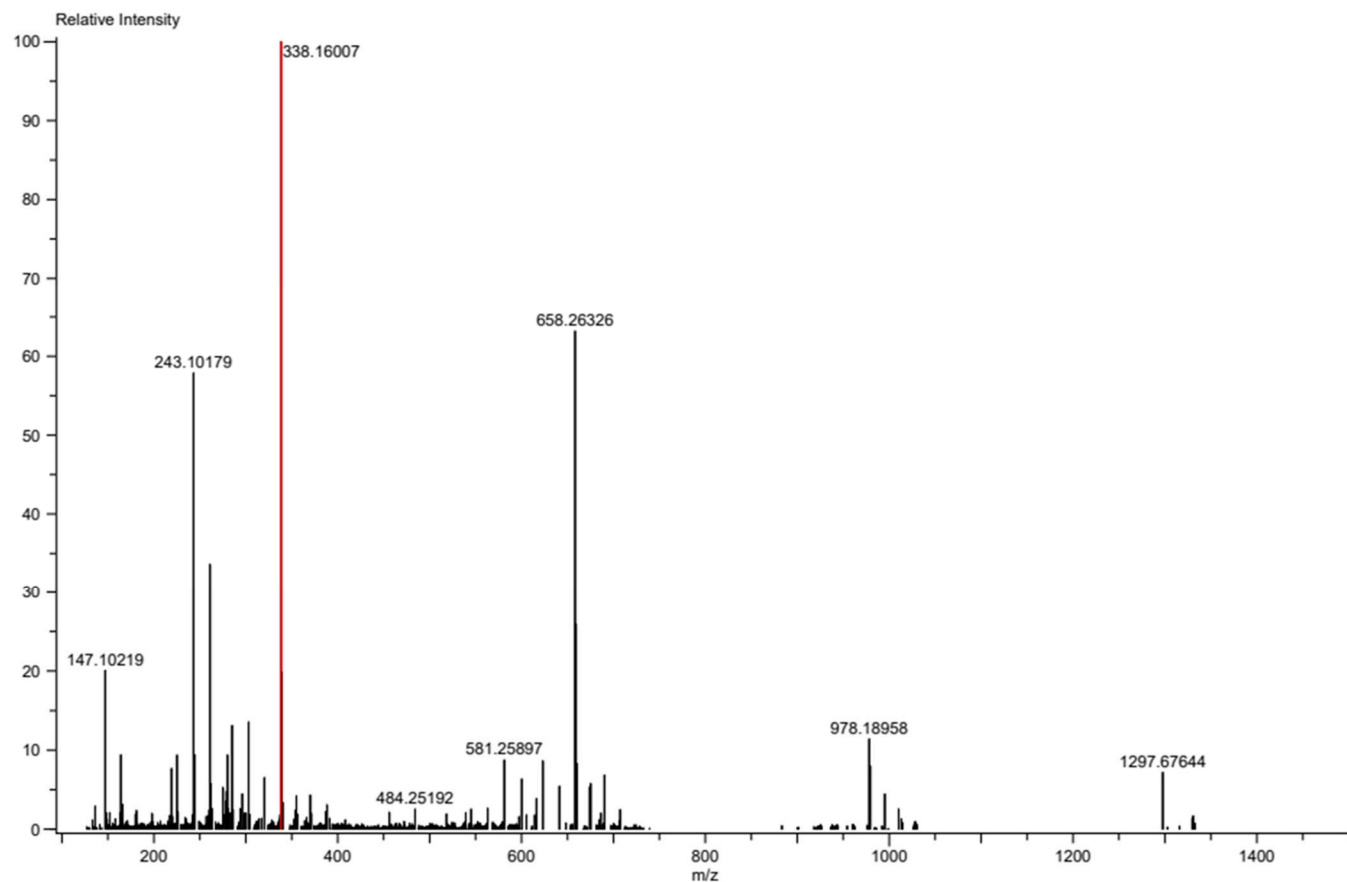

**Fig. S10.** IR spectrum of compound **2**

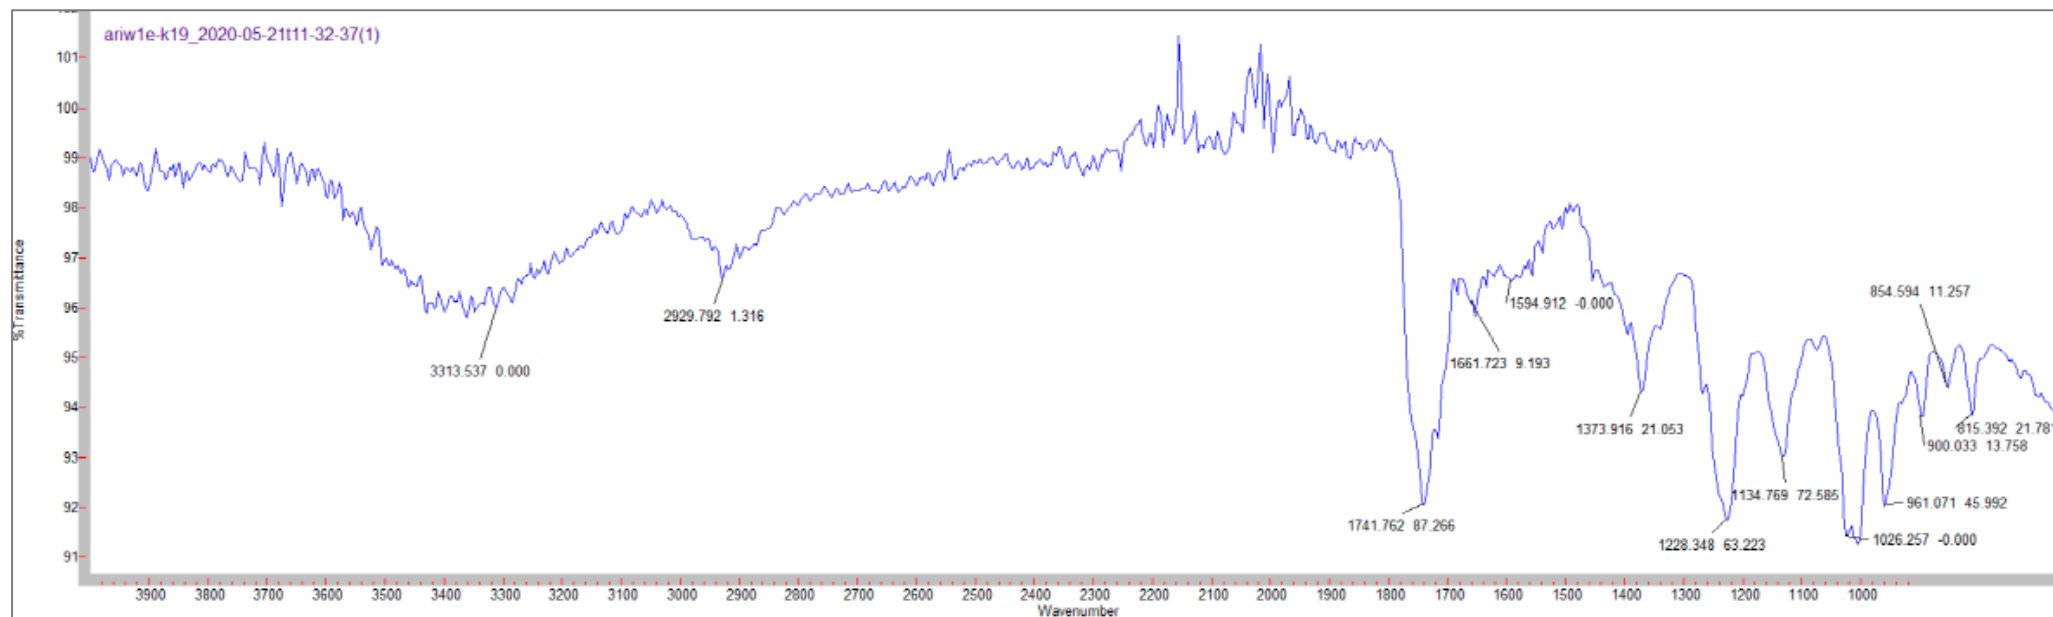

**Fig. S11.**  $^1\text{H}$  NMR spectrum of compound **2** (500 MHz, methanol- $d_4$ )

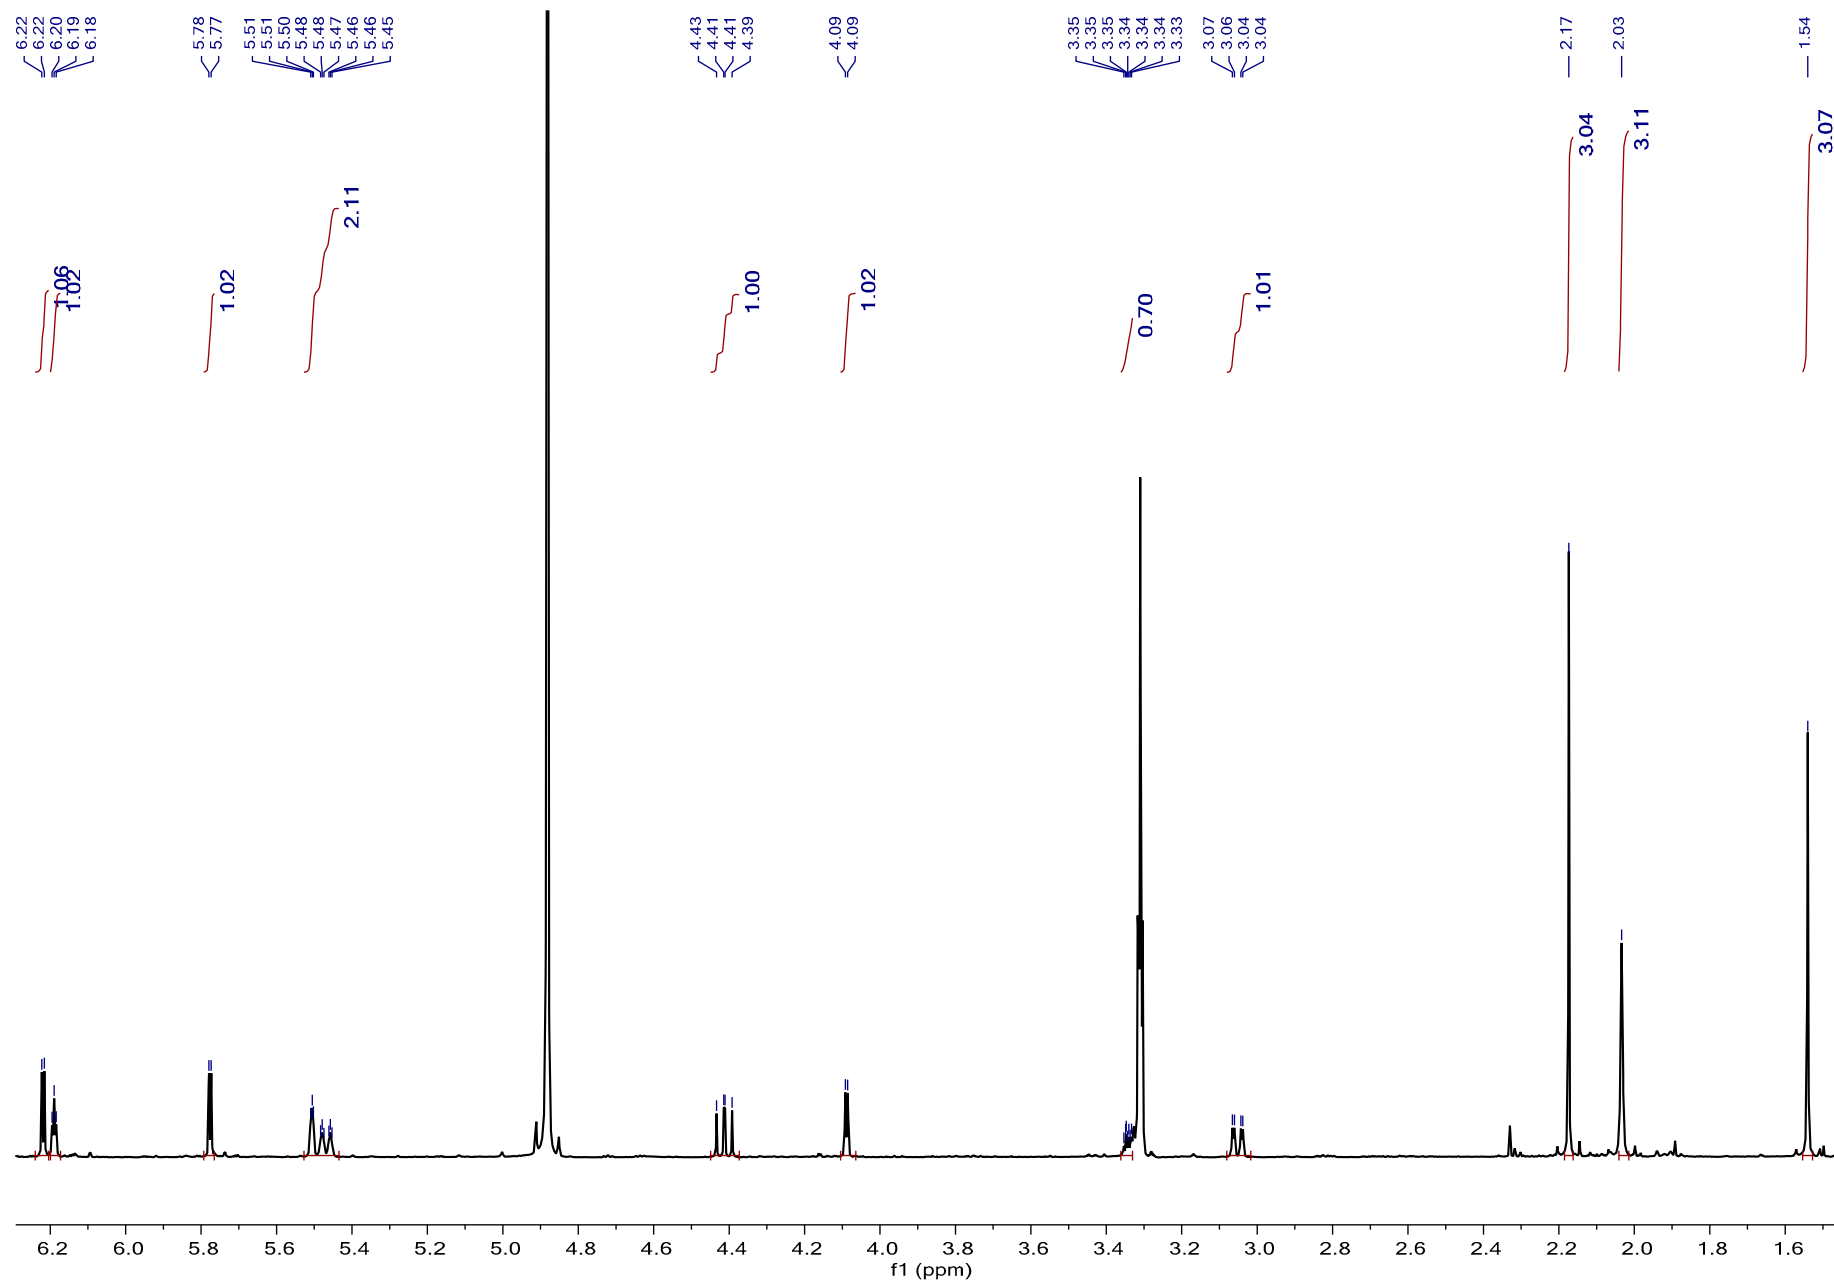

**Fig. S12.**  $^{13}\text{C}$  NMR spectrum of compound **2** (125 MHz, methanol- $d_4$ )

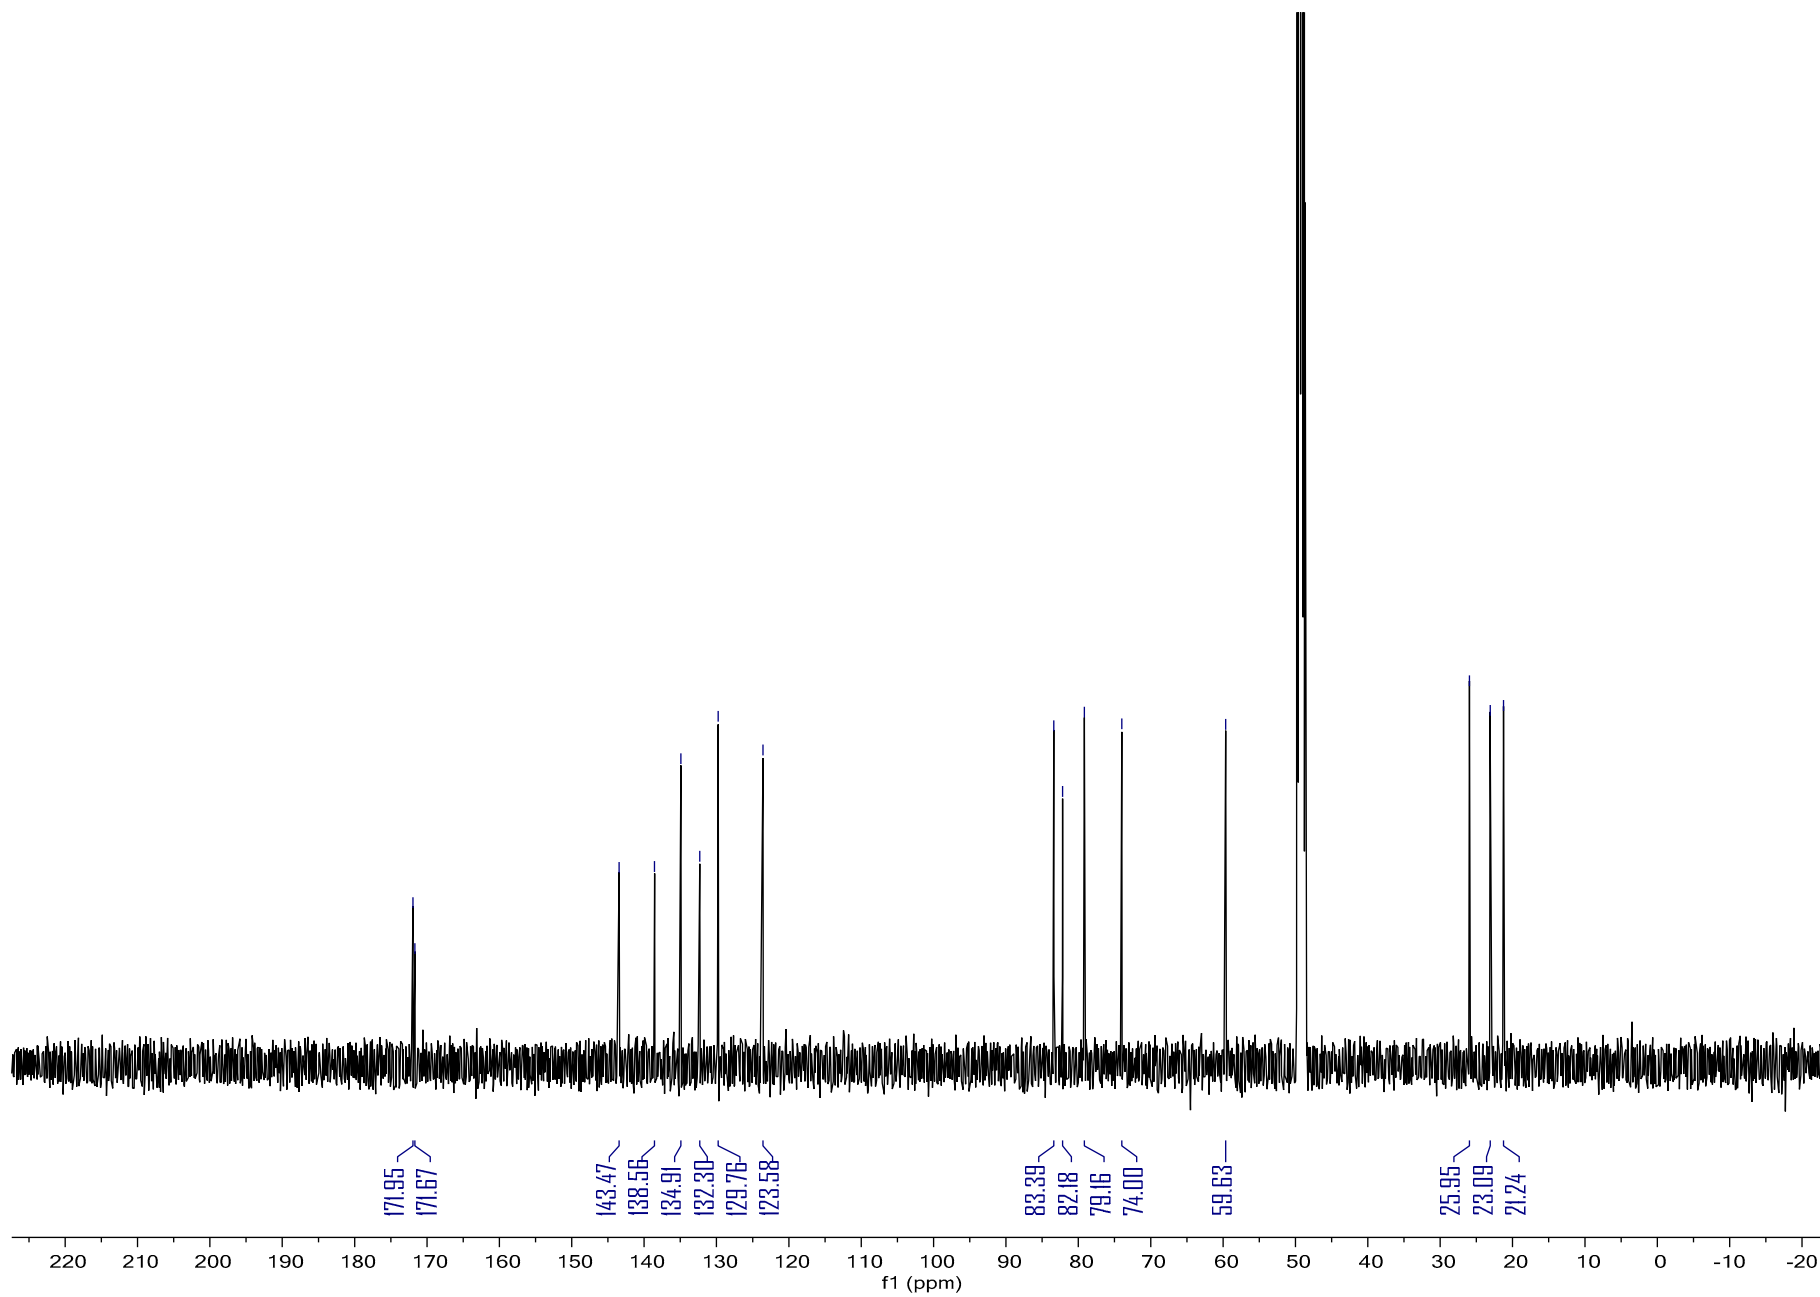

**Fig. S13.**  $^1\text{H}$   $^{13}\text{C}$  HSQC spectrum of compound **2**

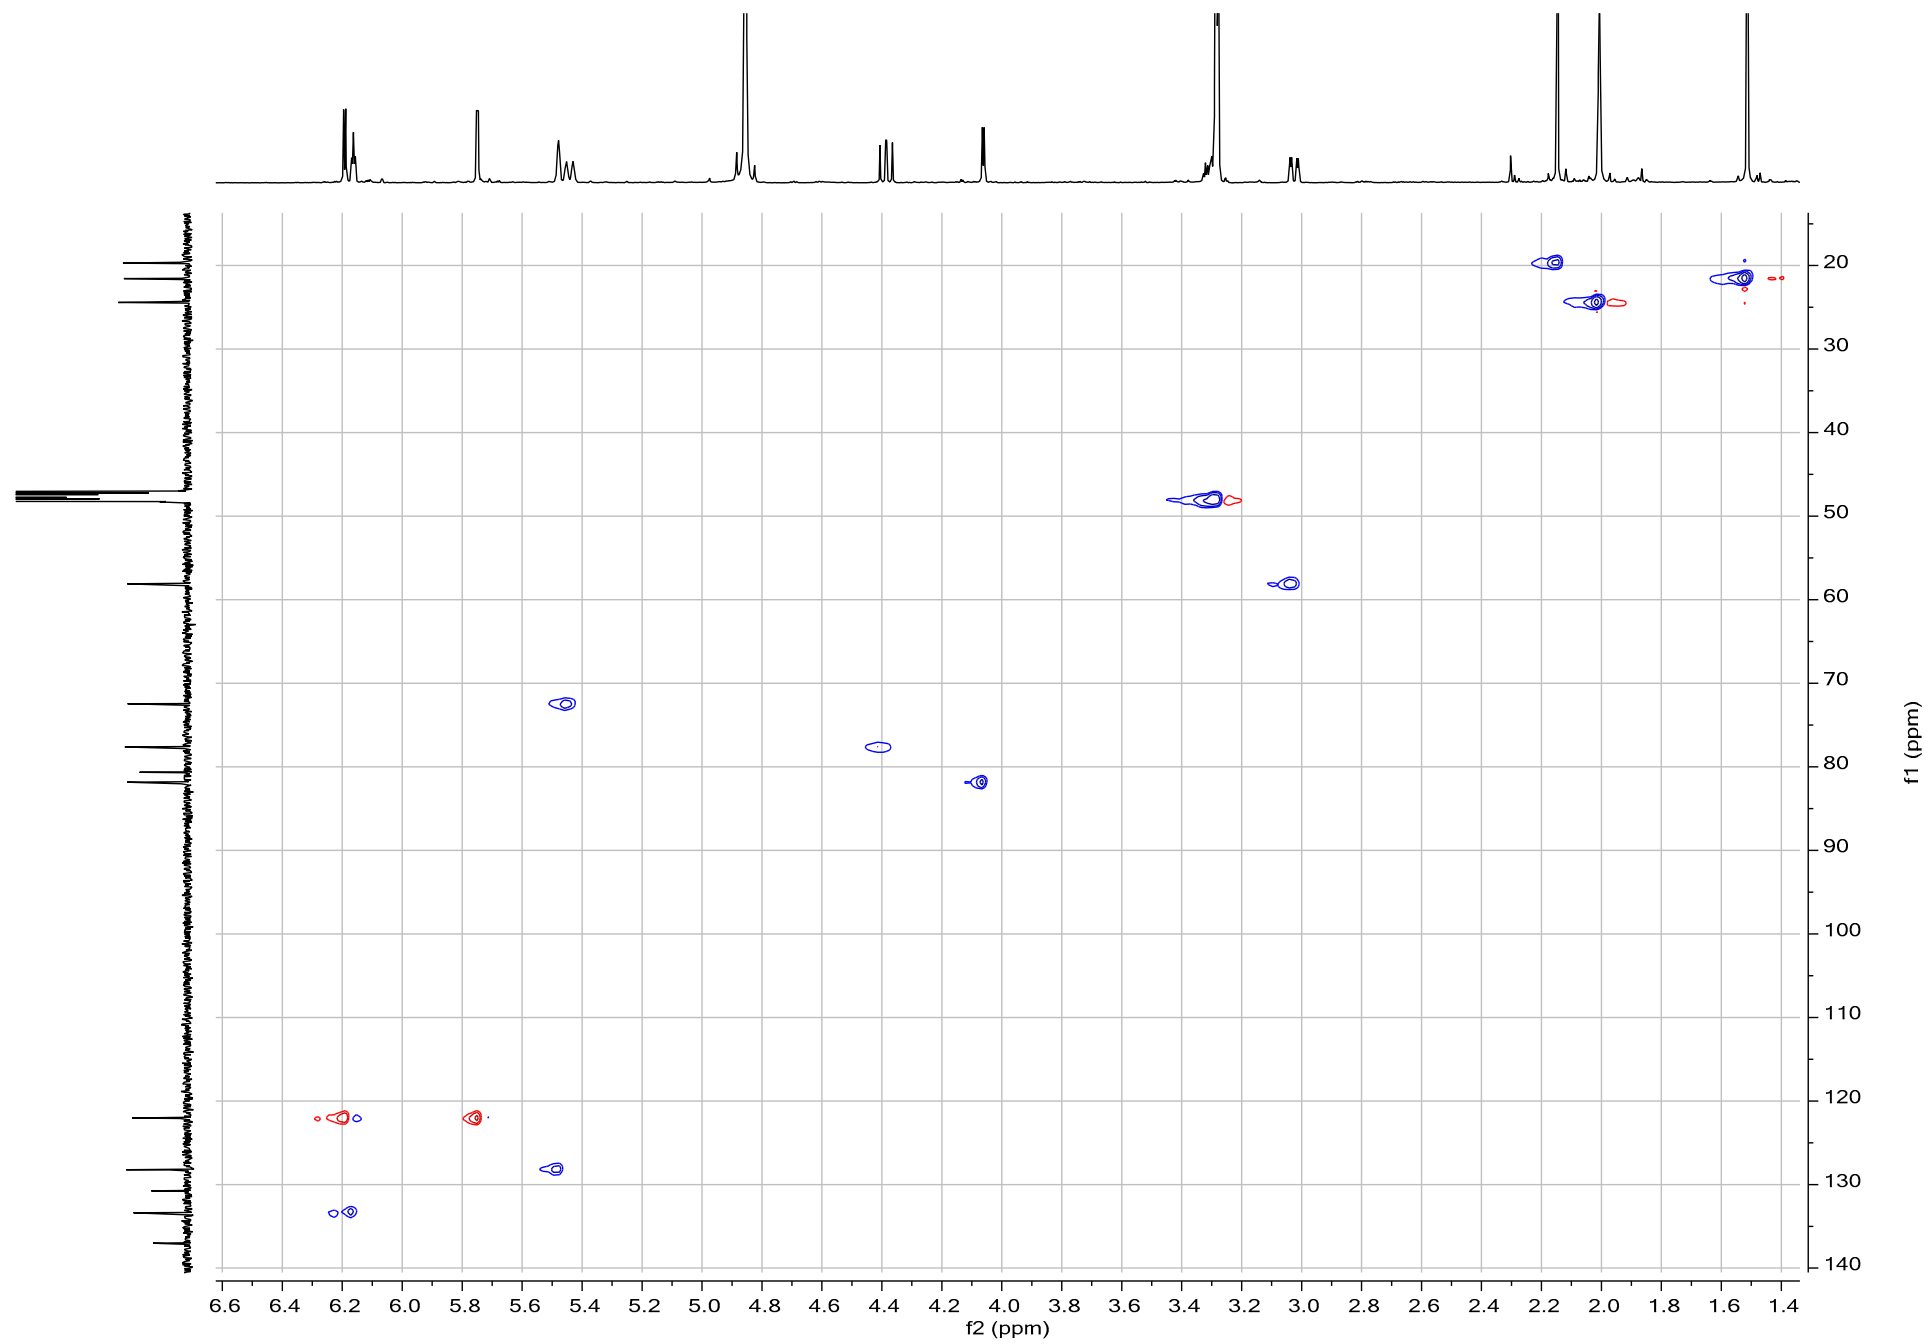

**Fig. S14.**  $^1\text{H}$   $^1\text{H}$  COSY spectrum of compound **2**

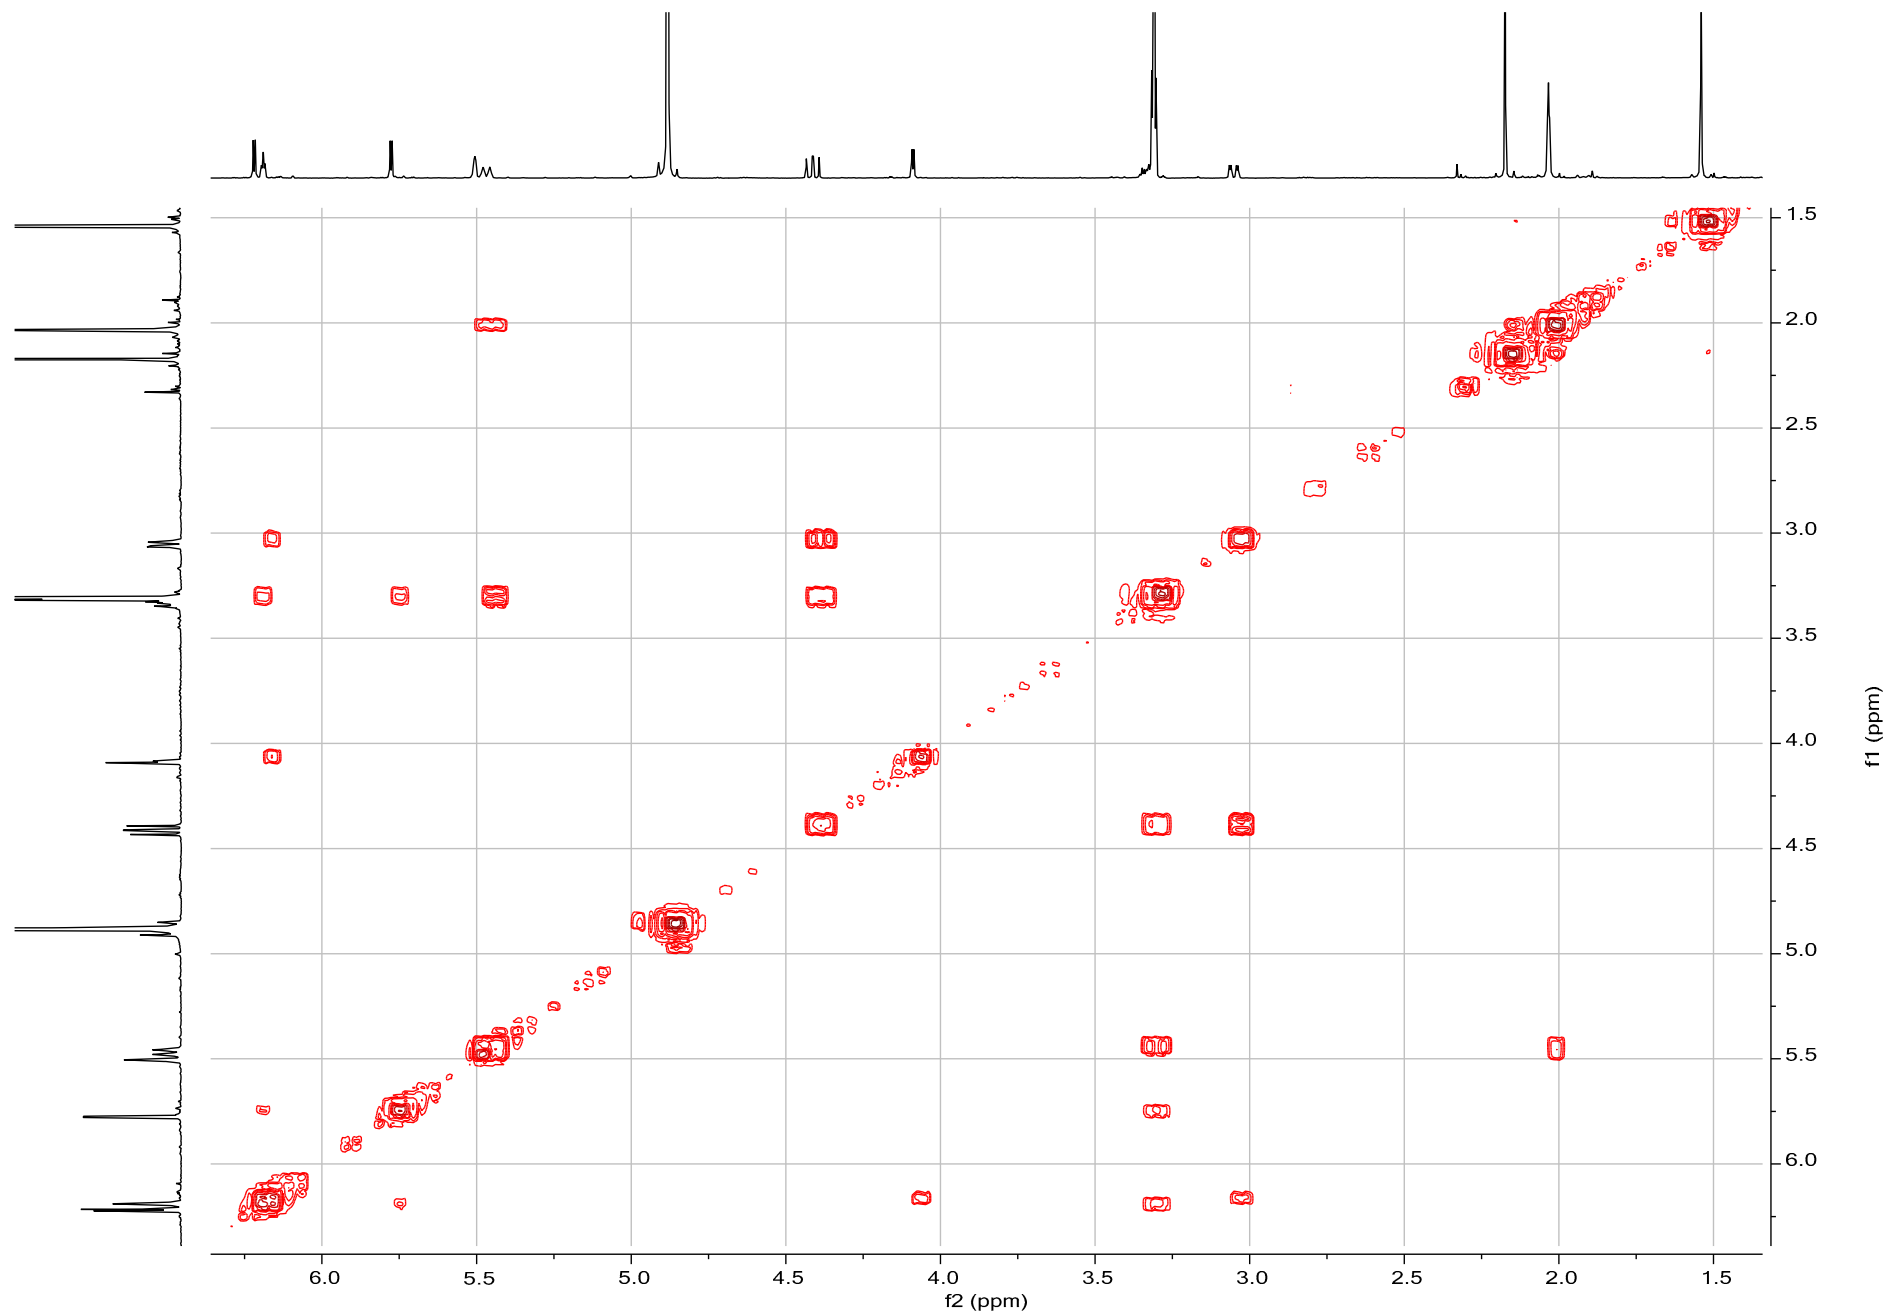

Fig. S15.  $^1\text{H}$   $^{13}\text{C}$  HMBC spectrum of compound 2

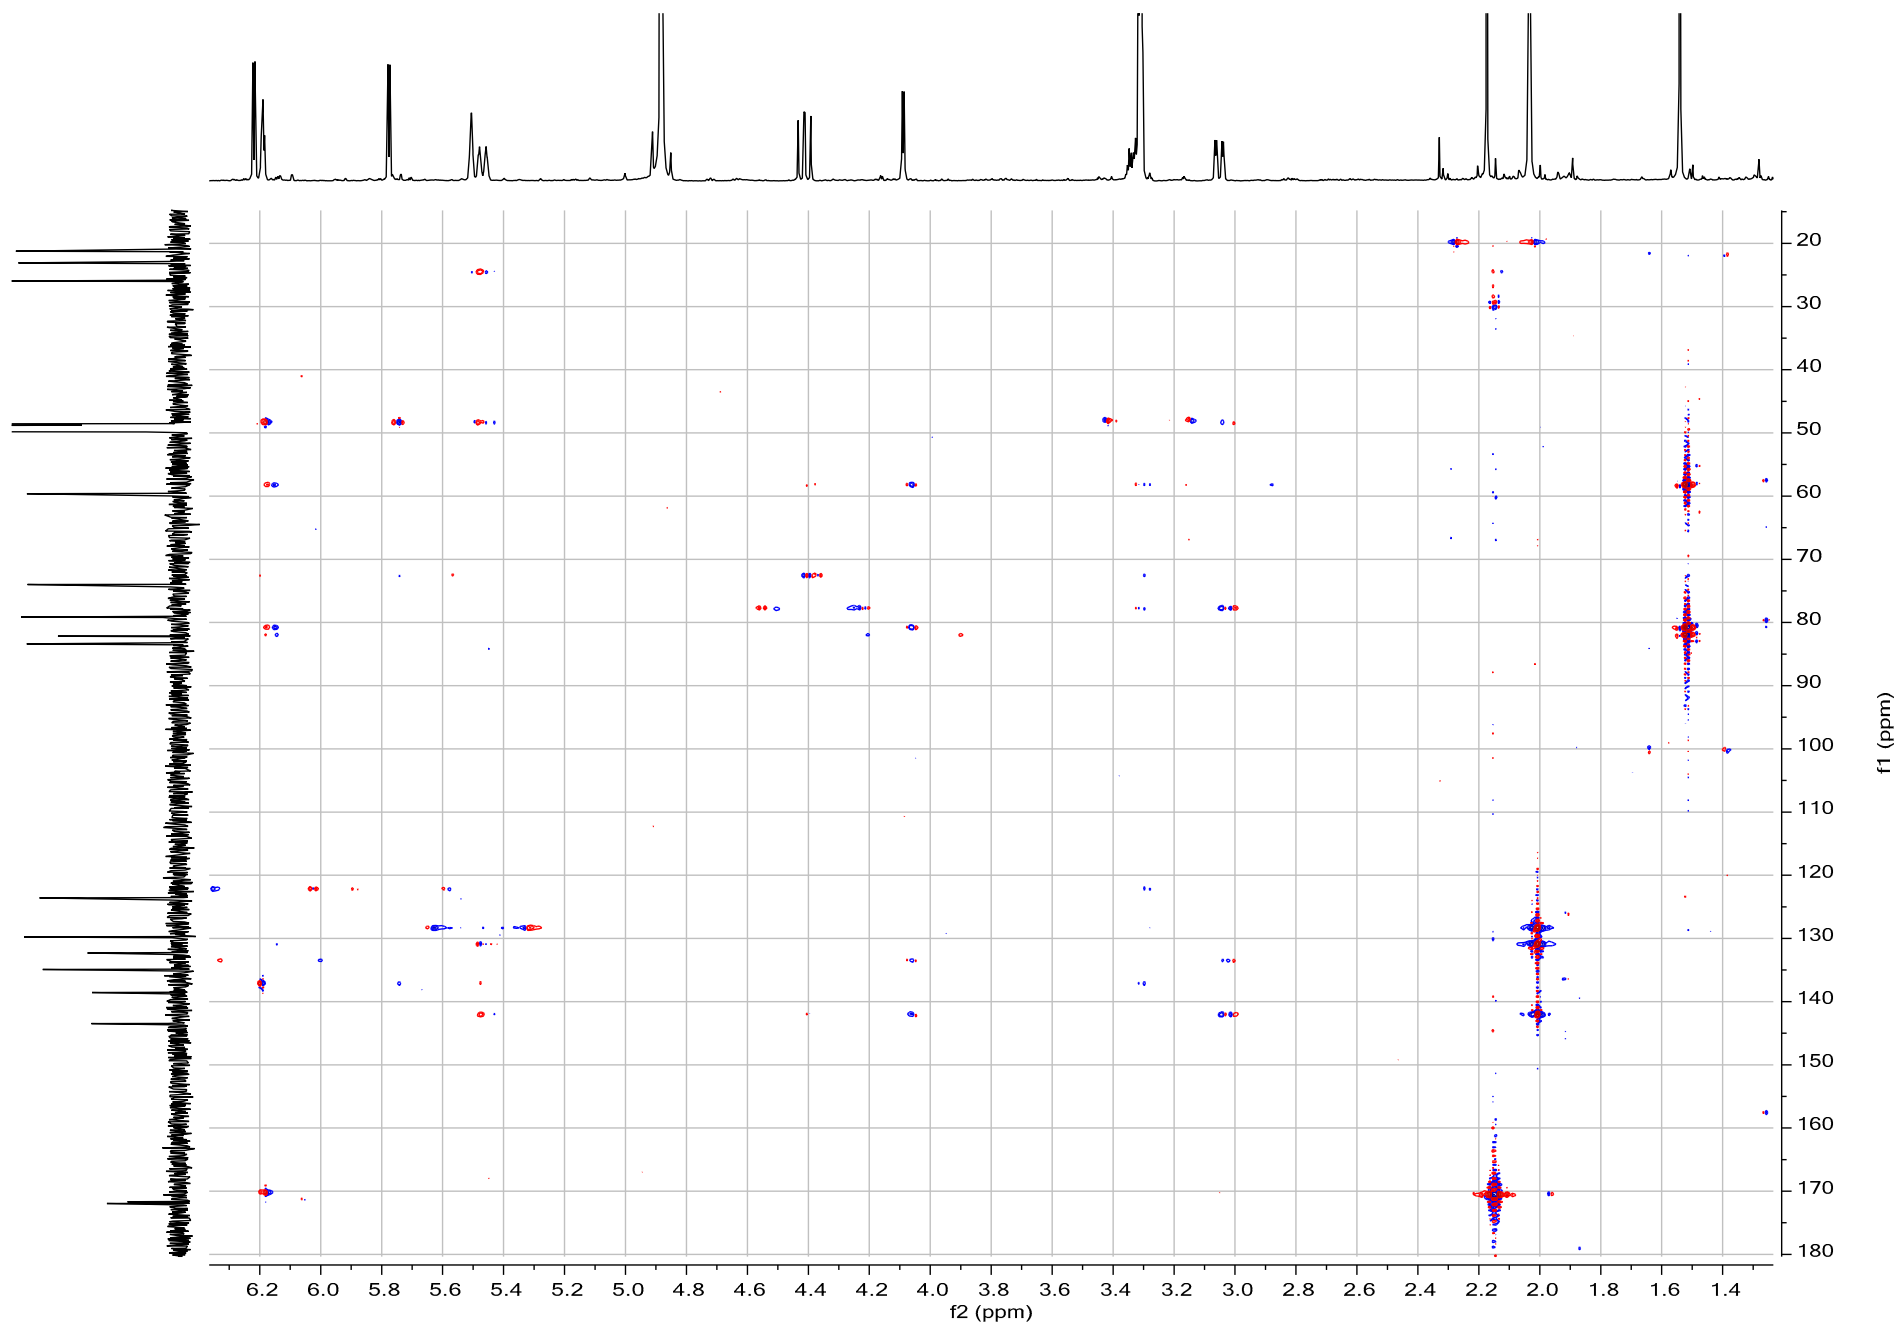



**Fig. S16.**  $^1\text{H}$   $^1\text{H}$  NOESY spectrum of compound 2

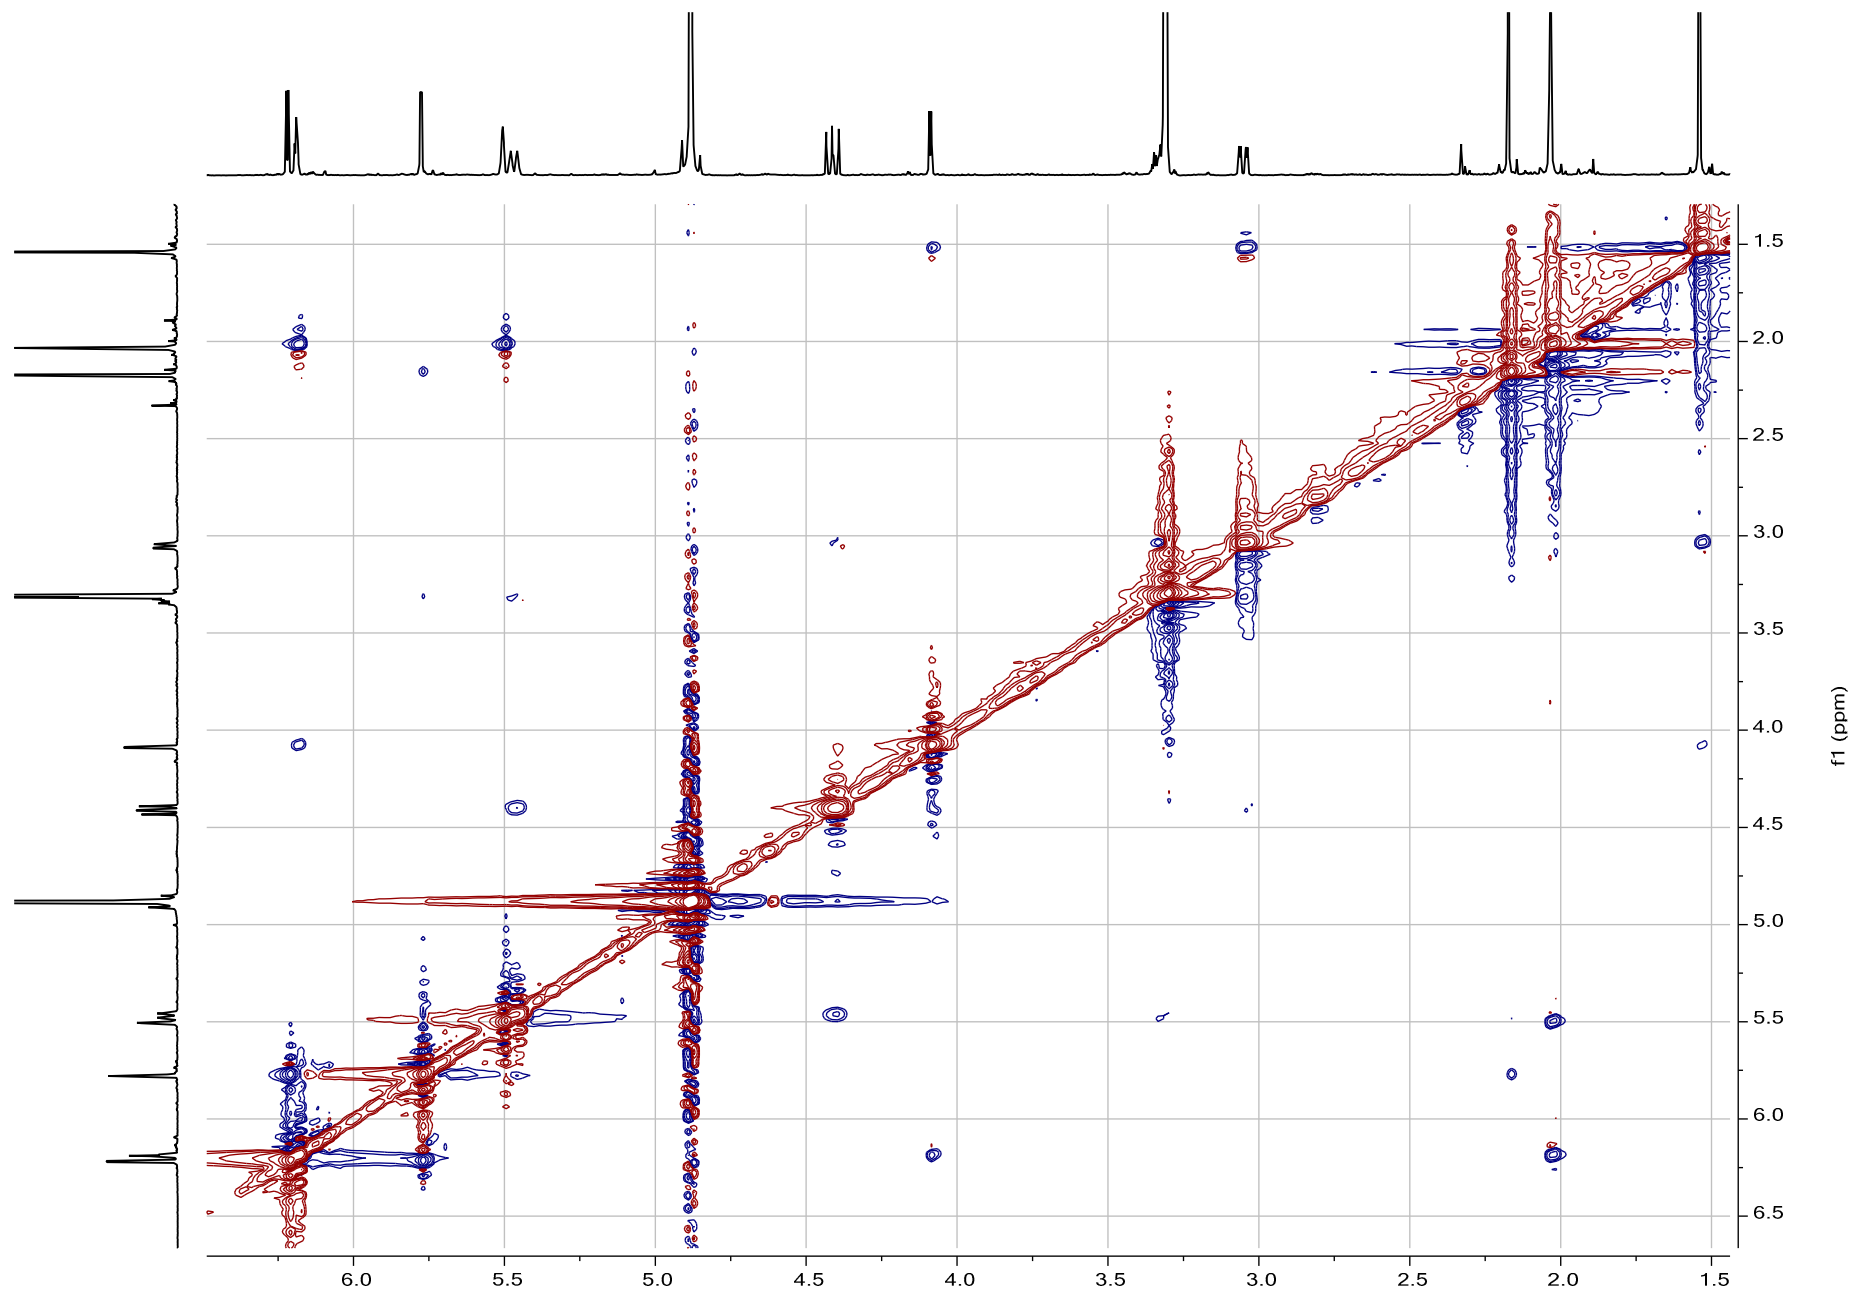

Supplement: s1 [file s1]
